# Supplementary material for: Reorganization of postmitotic neuronal chromatin accessibility for maturation of serotonergic identity
Source: bioRxiv preprint, doi:10.1101/2021.10.13.463782, version 2 (2021-11-29)
Supplement: Supplemental Table [file 463782_file04.csv]

chr11	51450107	51450439	chr11	51688874	51688875	1.7331852091985	0610009B22Rik
chr18	38040017	38040217	chr18	38250249	38250250	1.794890693921	0610009O20Rik
chr18	38186074	38186464	chr18	38250249	38250250	2.00215542246181	0610009O20Rik
chr11	70015155	70015718	chr11	70237914	70237915	1.31373581739945	0610010K14Rik
chr11	70230654	70230960	chr11	70237914	70237915	3.63229554070351	0610010K14Rik
chr4	107659176	107659533	chr4	107889813	107889814	2.74205583996943	0610037L13Rik
chr4	107923170	107924030	chr4	107889813	107889814	2.53727468883295	0610037L13Rik
chr4	108005546	108005944	chr4	107889813	107889814	1.83017244708233	0610037L13Rik
chr4	108079941	108080141	chr4	107889813	107889814	1.3122995971742	0610037L13Rik
chr5	63766853	63767308	chr5	63812495	63812496	3.58169931984575	0610040J01Rik
chr5	63872256	63872609	chr5	63812495	63812496	1.75561900137893	0610040J01Rik
chr5	63906505	63906997	chr5	63812495	63812496	1.36958347342635	0610040J01Rik
chr5	63968429	63969368	chr5	63812495	63812496	4.2277832001684	0610040J01Rik
chr12	3309192	3310628	chr12	3427011	3427012	1.70226413632421	1110002L01Rik
chr12	3465274	3465476	chr12	3427011	3427012	2.44511673055295	1110002L01Rik
chr12	3626858	3627378	chr12	3427011	3427012	2.36625864265584	1110002L01Rik
chr16	90689317	90689754	chr16	90934927	90934928	1.69253262826387	1110004E09Rik
chr16	91069177	91069547	chr16	90934927	90934928	2.72946506854946	1110004E09Rik
chr7	115941931	115942374	chr7	116093301	116093302	1.93373553980109	1110004F10Rik
chr7	116184015	116184258	chr7	116093301	116093302	3.65875195254199	1110004F10Rik
chr7	116260628	116261246	chr7	116093301	116093302	4.57062035255788	1110004F10Rik
chr2	156774999	156775656	chr2	156863128	156863129	1.35134903449261	1110008F13Rik
chr2	156892241	156892717	chr2	156863128	156863129	1.93709217677001	1110008F13Rik
chr2	32322892	32323739	chr2	32381938	32381939	5.86210391226135	1110008P14Rik
chr2	32342746	32343441	chr2	32381938	32381939	3.15360791870302	1110008P14Rik
chr2	32352278	32353689	chr2	32381938	32381939	2.70737150588202	1110008P14Rik
chr2	32404852	32405193	chr2	32381938	32381939	1.31245989748089	1110008P14Rik
chr2	32423835	32424484	chr2	32381938	32381939	2.64830309986875	1110008P14Rik
chr2	32428401	32428818	chr2	32381938	32381939	2.71818724380919	1110008P14Rik
chr2	32570648	32571223	chr2	32381938	32381939	2.75300575502944	1110008P14Rik
chr2	32575623	32576298	chr2	32381938	32381939	1.77007709000376	1110008P14Rik
chr2	32581497	32582012	chr2	32381938	32381939	2.95056121187805	1110008P14Rik
chr2	32625380	32626256	chr2	32381938	32381939	3.13221113141024	1110008P14Rik
chr4	41542862	41543113	chr4	41517333	41517334	2.16340238697855	1110017D15Rik
chr4	41653517	41653792	chr4	41517333	41517334	1.87555275731123	1110017D15Rik
chr9	50693855	50694092	chr9	50775520	50775521	1.82840918464687	1110032A03Rik
chr9	50841320	50841624	chr9	50775520	50775521	5.30856634365653	1110032A03Rik
chr9	50887645	50887845	chr9	50775520	50775521	1.47695423905986	1110032A03Rik
chr9	50924613	50924983	chr9	50775520	50775521	1.36078423193135	1110032A03Rik
chr3	68708440	68708739	chr3	68869586	68869587	1.65591197970752	1110032F04Rik
chr3	68822057	68822422	chr3	68869586	68869587	1.93592523764294	1110032F04Rik
chr3	69004382	69005507	chr3	68869586	68869587	1.44419604834861	1110032F04Rik
chr2	132723791	132724680	chr2	132686931	132686932	4.15052210873773	1110034G24Rik
chr15	76715346	76716041	chr15	76948539	76948540	1.39586712479534	1110038F14Rik
chr15	76816958	76818567	chr15	76948539	76948540	2.06696883889628	1110038F14Rik
chr15	76999038	76999393	chr15	76948539	76948540	3.21538421895711	1110038F14Rik
chr15	77026129	77026648	chr15	76948539	76948540	3.82359472219344	1110038F14Rik
chr2	91383305	91383718	chr2	91444704	91444705	1.79238346845342	1110051M20Rik
chr4	124656998	124658066	chr4	124851196	124851197	2.68611076422356	1110065P20Rik
chr9	94425988	94426288	chr9	94538081	94538082	1.57729078528898	1190002N15Rik
chr9	94498352	94498665	chr9	94538081	94538082	1.86288201779627	1190002N15Rik
chr9	94537279	94539073	chr9	94538081	94538082	1.66342613469853	1190002N15Rik
chr9	94610769	94611373	chr9	94538081	94538082	3.06736865393185	1190002N15Rik
chr9	94614040	94614343	chr9	94538081	94538082	1.52334710426193	1190002N15Rik
chr9	94620621	94621420	chr9	94538081	94538082	1.66110168058134	1190002N15Rik
chr8	120397463	120398022	chr8	120647632	120647633	1.6569092820082	1190005I06Rik
chr8	120634426	120634970	chr8	120647632	120647633	2.06759854777323	1190005I06Rik
chr8	120641257	120641813	chr8	120647632	120647633	2.79613098701169	1190005I06Rik
chr10	82685632	82685832	chr10	82623228	82623229	2.471484359233	1190007I07Rik
chr4	155959493	155959772	chr4	155734727	155734728	1.67578120267504	1500002C15Rik
chr15	82127718	82128455	chr15	82252397	82252398	1.53450538266499	1500009C09Rik
chr10	83634748	83635013	chr10	83722865	83722866	5.03687832242083	1500009L16Rik
chr10	83836707	83837037	chr10	83722865	83722866	1.34771934507218	1500009L16Rik
chr10	83871044	83871387	chr10	83722865	83722866	2.35400546088442	1500009L16Rik
chr10	83949104	83949997	chr10	83722865	83722866	4.21248157683536	1500009L16Rik
chr5	114681186	114681478	chr5	114813976	114813977	1.70655856469465	1500011B03Rik
chr5	114682877	114683328	chr5	114813976	114813977	2.58237120314344	1500011B03Rik
chr5	114813560	114814300	chr5	114813976	114813977	1.45656212446001	1500011B03Rik
chr5	114842196	114842704	chr5	114813976	114813977	1.7317943612099	1500011B03Rik
chr2	127656201	127656850	chr2	127792488	127792489	1.58994696063625	1500011K16Rik
chr1	43616025	43616445	chr1	43730602	43730603	10.1359140567039	1500015O10Rik
chr1	43633480	43633797	chr1	43730602	43730603	5.8071206142485	1500015O10Rik
chr1	43694985	43695412	chr1	43730602	43730603	7.08516733725869	1500015O10Rik
chr5	24825957	24826272	chr5	24985842	24985843	1.55754554604109	1500035N22Rik
chr5	24936811	24937011	chr5	24985842	24985843	1.55750263626676	1500035N22Rik
chr5	24985645	24986407	chr5	24985842	24985843	11.9618199920755	1500035N22Rik
chr5	24991931	24992410	chr5	24985842	24985843	4.32254746578796	1500035N22Rik
chr5	25010559	25010862	chr5	24985842	24985843	1.87701708935778	1500035N22Rik
chr5	25062691	25063119	chr5	24985842	24985843	1.33541473572932	1500035N22Rik
chr10	79984391	79985492	chr10	80172944	80172945	1.78630841916308	1600002K03Rik
chr10	79985944	79986144	chr10	80172944	80172945	1.62781771109047	1600002K03Rik
chr10	80150763	80151005	chr10	80172944	80172945	1.37474199760103	1600002K03Rik
chr10	80172974	80173516	chr10	80172944	80172945	1.78355512187056	1600002K03Rik
chr10	80208895	80209475	chr10	80172944	80172945	2.9288199580987	1600002K03Rik
chr10	80264749	80265336	chr10	80172944	80172945	1.31176481449936	1600002K03Rik
chr10	80300769	80301328	chr10	80172944	80172945	1.64581845590124	1600002K03Rik
chr10	80342515	80343188	chr10	80172944	80172945	2.38280355365346	1600002K03Rik
chr10	80422332	80423171	chr10	80172944	80172945	2.43571231320874	1600002K03Rik
chr17	15088298	15089303	chr17	14943184	14943185	2.51741046897116	1600012H06Rik
chr17	15108511	15109323	chr17	14943184	14943185	2.49189515303753	1600012H06Rik
chr17	15180475	15180857	chr17	14943184	14943185	1.69584778011344	1600012H06Rik
chr7	38061082	38061976	chr7	38183217	38183218	1.46612987442353	1600014C10Rik
chr7	38074653	38075069	chr7	38183217	38183218	2.40390557114873	1600014C10Rik
chr7	38227505	38228462	chr7	38183217	38183218	2.07858955143633	1600014C10Rik
chr17	45555666	45556373	chr17	45733844	45733845	1.68316366268873	1600014C23Rik
chr17	45584970	45585374	chr17	45733844	45733845	4.55453148972691	1600014C23Rik
chr17	45597235	45597527	chr17	45733844	45733845	2.076768045113	1600014C23Rik
chr17	45754523	45755039	chr17	45733844	45733845	5.23850150169626	1600014C23Rik
chr17	45767238	45767445	chr17	45733844	45733845	1.39227970106816	1600014C23Rik
chr17	45825656	45825856	chr17	45733844	45733845	2.01780445539053	1600014C23Rik
chr13	68597300	68597712	chr13	68597439	68597440	2.8282811771416	1700001L19Rik
chr13	68605848	68606246	chr13	68597439	68597440	1.54120048846475	1700001L19Rik
chr13	68622916	68623432	chr13	68597439	68597440	1.6555122324018	1700001L19Rik
chr2	30737867	30738295	chr2	30803661	30803662	4.53722495360556	1700001O22Rik
chr2	30744010	30744455	chr2	30803661	30803662	1.91942127217033	1700001O22Rik
chr6	82917251	82918212	chr6	83156404	83156405	4.21332753460892	1700003E16Rik
chr6	83032720	83033363	chr6	83156404	83156405	1.69995310129864	1700003E16Rik
chr2	154407548	154408506	chr2	154547085	154547086	1.39545807873292	1700003F12Rik
chr2	154558577	154559180	chr2	154547085	154547086	1.55416534658162	1700003F12Rik
chr5	98146234	98146579	chr5	98329354	98329355	1.53904169406814	1700007G11Rik
chr5	98292598	98293341	chr5	98329354	98329355	2.96071975468864	1700007G11Rik
chr5	98306608	98307002	chr5	98329354	98329355	1.9918833149626	1700007G11Rik
chr5	98475254	98475507	chr5	98329354	98329355	1.97407441441719	1700007G11Rik
chr5	98535477	98535988	chr5	98329354	98329355	2.44381277629178	1700007G11Rik
chr2	28386156	28386510	chr2	28466332	28466333	1.3653177381697	1700007K13Rik
chr2	28523869	28524192	chr2	28466332	28466333	1.70378526622414	1700007K13Rik
chr2	28539159	28539642	chr2	28466332	28466333	4.73982276586132	1700007K13Rik
chr2	28680951	28681158	chr2	28466332	28466333	1.92328573349729	1700007K13Rik
chr7	44281546	44282105	chr7	44385820	44385821	4.06655774245065	1700008O03Rik
chr17	8742756	8743060	chr17	8988333	8988334	1.9152111004944	1700010I14Rik
chr17	8988088	8988851	chr17	8988333	8988334	1.80434047642986	1700010I14Rik
chr17	9043118	9043662	chr17	8988333	8988334	2.50509453473908	1700010I14Rik
chr3	108509181	108509381	chr3	108534150	108534151	1.85330258394714	1700013F07Rik
chr3	108536447	108537781	chr3	108534150	108534151	1.42531717769035	1700013F07Rik
chr5	5290968	5291241	chr5	5479143	5479144	1.45706497301703	1700015F17Rik
chr5	5368629	5369128	chr5	5479143	5479144	2.43227283196471	1700015F17Rik
chr8	11634913	11636246	chr8	11701063	11701064	1.87721575783777	1700016D06Rik
chr8	11924360	11924572	chr8	11701063	11701064	2.16132882260642	1700016D06Rik
chr5	103773308	103773638	chr5	103656010	103656011	1.32861205689191	1700016H13Rik
chr11	75807679	75808051	chr11	75999912	75999913	1.39210218487479	1700016K19Rik
chr11	75865627	75866182	chr11	75999912	75999913	2.97822079263992	1700016K19Rik
chr9	57077100	57077300	chr9	57262599	57262600	1.52068246739435	1700017B05Rik
chr9	57279225	57279897	chr9	57262599	57262600	2.42769086081251	1700017B05Rik
chr9	57317771	57318404	chr9	57262599	57262600	1.84620870159351	1700017B05Rik
chr1	52952398	52953530	chr1	53020179	53020180	2.38058098755482	1700019D03Rik
chr1	52972092	52972627	chr1	53020179	53020180	7.42630306499908	1700019D03Rik
chr1	52973291	52973507	chr1	53020179	53020180	1.94146500995628	1700019D03Rik
chr19	5348789	5349570	chr19	5503787	5503788	1.86610684747756	1700020D05Rik
chr10	43660204	43660404	chr10	43540994	43540995	1.36803733369034	1700021F05Rik
chr4	42897124	42897695	chr4	42969604	42969605	3.51606153985038	1700022I11Rik
chr4	42946919	42947333	chr4	42969604	42969605	1.37866930734051	1700022I11Rik
chr4	43045810	43046457	chr4	42969604	42969605	1.56578921116545	1700022I11Rik
chr11	102963104	102964275	chr11	103208558	103208559	2.44745384701064	1700023F06Rik
chr11	103276096	103276866	chr11	103208558	103208559	4.29323889193169	1700023F06Rik
chr11	103292218	103292722	chr11	103208558	103208559	1.91851254053889	1700023F06Rik
chr1	151900973	151901322	chr1	152090125	152090126	2.93937233465838	1700025G04Rik
chr1	151977745	151978123	chr1	152090125	152090126	2.87972688568761	1700025G04Rik
chr1	152030720	152030942	chr1	152090125	152090126	2.30597130741793	1700025G04Rik
chr1	152082430	152082864	chr1	152090125	152090126	4.80905966806012	1700025G04Rik
chr1	152130515	152130794	chr1	152090125	152090126	3.75309106200123	1700025G04Rik
chr1	152164829	152165646	chr1	152090125	152090126	2.18176414383985	1700025G04Rik
chr1	152165657	152166012	chr1	152090125	152090126	4.17194901035622	1700025G04Rik
chr1	152203131	152203331	chr1	152090125	152090126	1.31633802570037	1700025G04Rik
chr1	152203435	152203748	chr1	152090125	152090126	2.20382237839776	1700025G04Rik
chr7	44271539	44271839	chr7	44236122	44236123	1.35630735121779	1700028J19Rik
chr7	44318102	44318358	chr7	44236122	44236123	3.34009909270155	1700028J19Rik
chr7	44382805	44383011	chr7	44236122	44236123	1.32447769959411	1700028J19Rik
chr7	44430177	44430635	chr7	44236122	44236123	2.85923128416997	1700028J19Rik
chr19	23479147	23479347	chr19	23652812	23652813	1.93223765741991	1700028P14Rik
chr19	23661243	23661443	chr19	23652812	23652813	1.79166166781676	1700028P14Rik
chr2	92141142	92141412	chr2	92382538	92382539	1.45340533684245	1700029I15Rik
chr2	92423959	92424184	chr2	92382538	92382539	1.45025886271907	1700029I15Rik
chr2	92609006	92609460	chr2	92382538	92382539	1.94518564060714	1700029I15Rik
chr8	45844552	45844844	chr8	45975252	45975253	2.00085946249024	1700029J07Rik
chr8	116868938	116869233	chr8	116978943	116978944	1.54709076617064	1700030J22Rik
chr8	72311073	72311390	chr8	72443880	72443881	2.29014495432666	1700030K09Rik
chr8	72410710	72411049	chr8	72443880	72443881	2.05695545039166	1700030K09Rik
chr2	130978115	130978854	chr2	131160081	131160082	5.33497675400653	1700037H04Rik
chr2	131040993	131041982	chr2	131160081	131160082	3.26423823908465	1700037H04Rik
chr2	131186666	131187564	chr2	131160081	131160082	1.63852931586386	1700037H04Rik
chr1	184065922	184066684	chr1	184034301	184034302	5.62038355433324	1700056E22Rik
chr1	184266332	184266607	chr1	184034301	184034302	1.33564195083399	1700056E22Rik
chr17	56934973	56936122	chr17	56875477	56875478	1.65765346939471	1700061G19Rik
chr17	57059694	57060974	chr17	56875477	56875478	1.49495380788002	1700061G19Rik
chr17	57096325	57097043	chr17	56875477	56875478	1.78644231704093	1700061G19Rik
chr1	57174396	57174910	chr1	57377620	57377621	1.3046303538986	1700066M21Rik
chr1	57437132	57437438	chr1	57377620	57377621	2.74104087331979	1700066M21Rik
chr1	57538663	57539203	chr1	57377620	57377621	1.93269847980722	1700066M21Rik
chr8	83783190	83783759	chr8	84001502	84001503	1.8928526557734	1700067K01Rik
chr8	83901093	83901324	chr8	84001502	84001503	1.36113297774278	1700067K01Rik
chr11	65341805	65342097	chr11	65159891	65159892	3.08170374366419	1700086D15Rik
chr15	78988616	78988895	chr15	79141253	79141254	1.9133650616613	1700088E04Rik
chr15	79039141	79039359	chr15	79141253	79141254	1.46272996785607	1700088E04Rik
chr15	79374472	79375301	chr15	79141253	79141254	3.47454952943833	1700088E04Rik
chr11	23679423	23679751	chr11	23521155	23521156	3.09184818582047	1700093K21Rik
chr9	108401360	108401906	chr9	108392805	108392806	1.76593095825485	1700102P08Rik
chr9	108431707	108432160	chr9	108392805	108392806	1.92437967141216	1700102P08Rik
chr5	3516616	3517300	chr5	3571566	3571567	1.30355548271389	1700109H08Rik
chr10	86819628	86820395	chr10	87058045	87058046	2.01059894298605	1700113H08Rik
chr10	86865974	86866250	chr10	87058045	87058046	3.27327647874627	1700113H08Rik
chr10	86990889	86991208	chr10	87058045	87058046	1.84080088431433	1700113H08Rik
chr10	87011089	87011374	chr10	87058045	87058046	1.54904234774178	1700113H08Rik
chr14	54475671	54477149	chr14	54686171	54686172	1.30744450107472	1700123O20Rik
chr14	54701539	54701766	chr14	54686171	54686172	1.75191602511185	1700123O20Rik
chr14	54714239	54715299	chr14	54686171	54686172	5.11252641426088	1700123O20Rik
chr14	54772448	54772925	chr14	54686171	54686172	3.83470853961441	1700123O20Rik
chr14	54781098	54781524	chr14	54686171	54686172	1.5059270182669	1700123O20Rik
chr14	54781753	54782258	chr14	54686171	54686172	1.54506250516653	1700123O20Rik
chr14	54790733	54791292	chr14	54686171	54686172	3.50382988791739	1700123O20Rik
chr14	54825978	54826470	chr14	54686171	54686172	1.58717242814037	1700123O20Rik
chr14	54863807	54864574	chr14	54686171	54686172	3.98092054918813	1700123O20Rik
chr14	54876199	54877859	chr14	54686171	54686172	1.58081868084082	1700123O20Rik
chr14	54912028	54913534	chr14	54686171	54686172	2.20304329621136	1700123O20Rik
chr19	9082516	9083044	chr19	8888853	8888854	1.33734477302738	1810009A15Rik
chr16	8997250	8998011	chr16	8830100	8830101	1.4213644142268	1810013L24Rik
chr16	9001073	9001293	chr16	8830100	8830101	2.21307779886443	1810013L24Rik
chr16	9026132	9026770	chr16	8830100	8830101	2.50461817128744	1810013L24Rik
chr3	14497194	14497604	chr3	14611285	14611286	6.73954887144592	1810022K09Rik
chr2	127376135	127376394	chr2	127208280	127208281	1.30502959461713	1810024B03Rik
chrX	12436078	12436278	chrX	12673668	12673669	1.32769581324851	1810030O07Rik
chrX	12436290	12436681	chrX	12673668	12673669	2.10831753682085	1810030O07Rik
chr11	116628868	116629279	chr11	116671660	116671661	4.43915752833749	1810032O08Rik
chr11	116811325	116812017	chr11	116671660	116671661	1.74718718656751	1810032O08Rik
chr11	116852508	116854088	chr11	116671660	116671661	1.35656579660593	1810032O08Rik
chr11	116885400	116885789	chr11	116671660	116671661	1.79727354954201	1810032O08Rik
chr15	84227055	84227407	chr15	84447097	84447098	2.03076051486937	1810041L15Rik
chr15	84245186	84245794	chr15	84447097	84447098	13.8764102116076	1810041L15Rik
chr15	84310590	84310801	chr15	84447097	84447098	3.34935871133397	1810041L15Rik
chr15	84360529	84361229	chr15	84447097	84447098	1.75368999389119	1810041L15Rik
chr15	84366691	84366891	chr15	84447097	84447098	1.91616051867632	1810041L15Rik
chr15	84393110	84393735	chr15	84447097	84447098	1.8545614529303	1810041L15Rik
chr15	84417832	84418567	chr15	84447097	84447098	23.101608771558	1810041L15Rik
chr15	84430669	84430869	chr15	84447097	84447098	3.82103879234467	1810041L15Rik
chr15	84467027	84467481	chr15	84447097	84447098	5.59579135477955	1810041L15Rik
chr15	84484473	84484750	chr15	84447097	84447098	3.47472767087852	1810041L15Rik
chr15	84518621	84519056	chr15	84447097	84447098	2.53935835319026	1810041L15Rik
chr15	84531654	84531929	chr15	84447097	84447098	7.26825477936188	1810041L15Rik
chr15	84614302	84614703	chr15	84447097	84447098	1.46020684482098	1810041L15Rik
chr15	84620140	84620467	chr15	84447097	84447098	2.59220590094615	1810041L15Rik
chr15	84622247	84622511	chr15	84447097	84447098	4.46195335443402	1810041L15Rik
chr10	77744808	77745269	chr10	77978524	77978525	2.02298685458742	1810043G02Rik
chr10	77933456	77933748	chr10	77978524	77978525	1.82231241987727	1810043G02Rik
chr10	78028329	78028628	chr10	77978524	77978525	1.39761116939194	1810043G02Rik
chr10	78100975	78101925	chr10	77978524	77978525	1.50762405821477	1810043G02Rik
chr19	3642003	3642234	chr19	3708333	3708334	1.98110461476988	1810055G02Rik
chr19	3686138	3686898	chr19	3708333	3708334	2.3578077006213	1810055G02Rik
chr19	3895219	3895419	chr19	3708333	3708334	6.16461970335312	1810055G02Rik
chr19	3907026	3907569	chr19	3708333	3708334	2.94946735933246	1810055G02Rik
chr19	3935321	3935521	chr19	3708333	3708334	2.805748567516	1810055G02Rik
chr12	111923897	111924183	chr12	111966977	111966978	5.38504430850166	2010107E04Rik
chr12	111974730	111975034	chr12	111966977	111966978	3.97076619035377	2010107E04Rik
chr12	112170407	112171635	chr12	111966977	111966978	3.55164257298387	2010107E04Rik
chr12	112187587	112187856	chr12	111966977	111966978	1.32015460437631	2010107E04Rik
chr12	112195189	112195731	chr12	111966977	111966978	1.78242400426178	2010107E04Rik
chr5	93206145	93207160	chr5	93206518	93206519	1.53364122594174	2010109A12Rik
chr5	93267015	93268730	chr5	93206518	93206519	1.33664505587224	2010109A12Rik
chr13	62866990	62867190	chr13	63014934	63014935	3.22502757109186	2010111I01Rik
chr13	62867203	62867470	chr13	63014934	63014935	3.45757570373499	2010111I01Rik
chr13	62893073	62893482	chr13	63014934	63014935	5.19144308124531	2010111I01Rik
chr13	62926707	62926957	chr13	63014934	63014935	1.42964621486232	2010111I01Rik
chr13	62990182	62990625	chr13	63014934	63014935	4.82108278316437	2010111I01Rik
chr13	63033116	63033374	chr13	63014934	63014935	1.52384229482941	2010111I01Rik
chr13	63155370	63155750	chr13	63014934	63014935	1.38299283472118	2010111I01Rik
chr8	84131139	84131339	chr8	84012171	84012172	1.53325590404314	2210011C24Rik
chr13	58148446	58148984	chr13	58385225	58385226	1.66672070123444	2210016F16Rik
chr13	58157526	58159035	chr13	58385225	58385226	3.3285331433551	2210016F16Rik
chr13	58384827	58385482	chr13	58385225	58385226	2.83370126730441	2210016F16Rik
chr13	58506837	58507235	chr13	58385225	58385226	2.14182481700614	2210016F16Rik
chr13	58560972	58561282	chr13	58385225	58385226	6.60321398767084	2210016F16Rik
chr5	114702757	114703024	chr5	114942158	114942159	1.38137273797238	2210016L21Rik
chr5	114773365	114773893	chr5	114942158	114942159	3.47474383159314	2210016L21Rik
chr5	114813560	114814300	chr5	114942158	114942159	1.46468280743856	2210016L21Rik
chr13	77177822	77178397	chr13	77135540	77135541	6.38577176206573	2210408I21Rik
chr9	63284741	63284941	chr9	63399246	63399247	2.39615367774754	2300009A05Rik
chr9	63555079	63555923	chr9	63399246	63399247	1.57581933129051	2300009A05Rik
chr10	80148836	80149912	chr10	80320537	80320538	1.9875528709622	2310011J03Rik
chr10	80179261	80180083	chr10	80320537	80320538	2.27734903965187	2310011J03Rik
chr10	80199547	80199951	chr10	80320537	80320538	2.59864673944594	2310011J03Rik
chr10	80260782	80261359	chr10	80320537	80320538	1.70727830593519	2310011J03Rik
chr10	80422332	80423171	chr10	80320537	80320538	3.73058352445632	2310011J03Rik
chr10	80464626	80465117	chr10	80320537	80320538	2.57965797513638	2310011J03Rik
chr10	80509604	80509823	chr10	80320537	80320538	1.40666938028286	2310011J03Rik
chr10	80566526	80567215	chr10	80320537	80320538	4.721172807503	2310011J03Rik
chr7	27797951	27798372	chr7	27553233	27553234	1.73860265462694	2310022A10Rik
chr8	124585793	124586186	chr8	124663369	124663370	3.34001779197395	2310022B05Rik
chr8	124644042	124644367	chr8	124663369	124663370	5.93572847335385	2310022B05Rik
chr9	50801240	50801446	chr9	50746521	50746522	4.11514229715997	2310030G06Rik
chr9	50922694	50923018	chr9	50746521	50746522	6.57989421188944	2310030G06Rik
chr11	59087686	59087970	chr11	59208321	59208322	1.30860884641409	2310033P09Rik
chr11	59239011	59239641	chr11	59208321	59208322	1.33025386699449	2310033P09Rik
chr11	59307900	59308340	chr11	59208321	59208322	1.39800491666583	2310033P09Rik
chr1	105882298	105882526	chr1	105663861	105663862	1.4238364163785	2310035C23Rik
chr17	46578882	46579129	chr17	46772635	46772636	2.01634052124105	2310039H08Rik
chr7	131477280	131477607	chr7	131362698	131362699	1.74764003736615	2310057M21Rik
chr7	131496942	131498029	chr7	131362698	131362699	6.93562825890439	2310057M21Rik
chr17	35685306	35685506	chr17	35897431	35897432	1.48294067146884	2310061I04Rik
chr7	44337480	44337680	chr7	44246722	44246723	1.53182175045175	2410002F23Rik
chr7	44454643	44454883	chr7	44246722	44246723	2.36053425011195	2410002F23Rik
chr3	145766316	145766692	chr3	145938014	145938015	2.26005575326631	2410004B18Rik
chr3	145894526	145894756	chr3	145938014	145938015	2.80882100679473	2410004B18Rik
chr3	145937801	145938833	chr3	145938014	145938015	1.36323510681751	2410004B18Rik
chr12	16818548	16819060	chr12	17011727	17011728	1.7633031656047	2410004P03Rik
chr12	17236119	17236492	chr12	17011727	17011728	2.92919238318737	2410004P03Rik
chr17	56373848	56374375	chr17	56609771	56609772	2.69356760371683	2410015M20Rik
chr17	56425302	56426068	chr17	56609771	56609772	1.36596721628067	2410015M20Rik
chr17	56445570	56445919	chr17	56609771	56609772	2.85937326658647	2410015M20Rik
chr17	56487690	56488624	chr17	56609771	56609772	4.92910552896377	2410015M20Rik
chr17	56507256	56508174	chr17	56609771	56609772	1.82536737717062	2410015M20Rik
chr17	56609563	56610388	chr17	56609771	56609772	1.64084668554101	2410015M20Rik
chr17	56626730	56628266	chr17	56609771	56609772	1.32043155375117	2410015M20Rik
chr17	56814355	56815257	chr17	56609771	56609772	1.33064863549668	2410015M20Rik
chr17	56831039	56831703	chr17	56609771	56609772	1.31396758118977	2410015M20Rik
chr5	118002190	118002608	chr5	118245227	118245228	3.35144185535266	2410131K14Rik
chr5	118063343	118064000	chr5	118245227	118245228	2.41991569516155	2410131K14Rik
chr5	118191882	118192554	chr5	118245227	118245228	1.65694843396268	2410131K14Rik
chr5	118205974	118206352	chr5	118245227	118245228	2.2917932054225	2410131K14Rik
chr5	118276775	118277558	chr5	118245227	118245228	1.32110842961367	2410131K14Rik
chr5	118321788	118322284	chr5	118245227	118245228	2.76284459491019	2410131K14Rik
chr5	118365406	118365709	chr5	118245227	118245228	2.6999574112499	2410131K14Rik
chr16	18629360	18630395	chr16	18836578	18836579	1.70140530663324	2510002D24Rik
chr16	18687107	18687857	chr16	18836578	18836579	1.58168880153261	2510002D24Rik
chr16	18733185	18733693	chr16	18836578	18836579	14.5669497805187	2510002D24Rik
chr16	18776990	18777993	chr16	18836578	18836579	5.7175420089003	2510002D24Rik
chr16	18811681	18812633	chr16	18836578	18836579	2.45965441577923	2510002D24Rik
chr16	18836398	18837360	chr16	18836578	18836579	3.60527648777583	2510002D24Rik
chr16	18858716	18859088	chr16	18836578	18836579	1.87676431614832	2510002D24Rik
chr16	21493103	21493545	chr16	21694665	21694666	2.3570959136864	2510009E07Rik
chr16	21702313	21702995	chr16	21694665	21694666	1.66945878927743	2510009E07Rik
chr16	21815702	21816157	chr16	21694665	21694666	3.23958222955677	2510009E07Rik
chr16	21859049	21859249	chr16	21694665	21694666	1.93082989403916	2510009E07Rik
chr16	21881350	21881818	chr16	21694665	21694666	1.91121138511111	2510009E07Rik
chr4	147953766	147954039	chr4	147940895	147940896	1.48956367844434	2510039O18Rik
chr4	148041101	148041606	chr4	147940895	147940896	1.71052772727433	2510039O18Rik
chr10	76259496	76260349	chr10	76449081	76449082	1.78657462333763	2610028H24Rik
chr4	10912636	10913138	chr4	10874498	10874499	1.73042645881676	2610301B20Rik
chr4	10964627	10965317	chr4	10874498	10874499	1.80355463874203	2610301B20Rik
chr4	10973108	10973707	chr4	10874498	10874499	2.29700069537404	2610301B20Rik
chr16	17055853	17056110	chr16	17125106	17125107	1.50531862249853	2610318N02Rik
chr16	17200941	17201811	chr16	17125106	17125107	1.38365434850299	2610318N02Rik
chr16	17222316	17222670	chr16	17125106	17125107	3.29701903526791	2610318N02Rik
chr11	78060540	78060864	chr11	78261752	78261753	1.64052901746777	2610507B11Rik
chr11	78163978	78164662	chr11	78261752	78261753	1.82423130234745	2610507B11Rik
chr11	78177977	78178328	chr11	78261752	78261753	1.47559660729057	2610507B11Rik
chr11	78188465	78189851	chr11	78261752	78261753	4.36552282887215	2610507B11Rik
chr11	78301395	78301878	chr11	78261752	78261753	3.32352663045452	2610507B11Rik
chr11	78347568	78347814	chr11	78261752	78261753	1.62511155701967	2610507B11Rik
chr11	78360347	78360547	chr11	78261752	78261753	1.49344213562973	2610507B11Rik
chr11	78399741	78400137	chr11	78261752	78261753	2.29832998262212	2610507B11Rik
chr11	78448371	78448571	chr11	78261752	78261753	2.44465875798932	2610507B11Rik
chr5	114681186	114681478	chr5	114823468	114823469	2.54713164394979	2610524H06Rik
chr5	114773365	114773893	chr5	114823468	114823469	2.10444640754335	2610524H06Rik
chr12	71279727	71280719	chr12	71136848	71136849	1.86566246771196	2700049A03Rik
chr18	24422745	24423318	chr18	24470861	24470862	7.7404878942931	2700062C07Rik
chr19	7176274	7176474	chr19	7417625	7417626	5.28959961906296	2700081O15Rik
chr19	7182436	7182998	chr19	7417625	7417626	6.4014351948925	2700081O15Rik
chr19	7234835	7235353	chr19	7417625	7417626	1.90465307374773	2700081O15Rik
chr19	7278820	7279068	chr19	7417625	7417626	2.65009695990929	2700081O15Rik
chr19	7279304	7279634	chr19	7417625	7417626	1.52405724771593	2700081O15Rik
chr19	7299209	7299564	chr19	7417625	7417626	4.24414515431436	2700081O15Rik
chr19	7482065	7482490	chr19	7417625	7417626	2.32122937495042	2700081O15Rik
chr19	7551718	7552323	chr19	7417625	7417626	1.93825643299041	2700081O15Rik
chr19	7606221	7607131	chr19	7417625	7417626	3.55836778475607	2700081O15Rik
chr19	7617820	7618175	chr19	7417625	7417626	1.72710386361767	2700081O15Rik
chr12	55302507	55303567	chr12	55080110	55080111	2.50826036633941	2700097O09Rik
chr8	124644042	124644367	chr8	124863029	124863030	1.87741215660236	2810004N23Rik
chr11	58619229	58619556	chr11	58867216	58867217	2.91190898624495	2810021J22Rik
chr3	88436898	88437369	chr3	88685794	88685795	3.00518412375577	2810403A07Rik
chr3	88522306	88522519	chr3	88685794	88685795	1.46198088204015	2810403A07Rik
chr3	88532877	88533621	chr3	88685794	88685795	2.58801569217838	2810403A07Rik
chr3	88758106	88758593	chr3	88685794	88685795	3.71534299704236	2810403A07Rik
chr3	88772534	88772910	chr3	88685794	88685795	1.80157589629417	2810403A07Rik
chr11	69921182	69922105	chr11	69900987	69900988	2.85531341087673	2810408A11Rik
chr1	85928072	85928867	chr1	86045863	86045864	2.9966119683095	2810459M11Rik
chr1	85933770	85934707	chr1	86045863	86045864	1.53907601370029	2810459M11Rik
chr1	86007911	86008314	chr1	86045863	86045864	2.92948119967284	2810459M11Rik
chr1	86214355	86214659	chr1	86045863	86045864	1.53748672314136	2810459M11Rik
chr1	86294687	86294937	chr1	86045863	86045864	1.45969714773158	2810459M11Rik
chr6	149309242	149310086	chr6	149309414	149309415	1.79385204849136	2810474O19Rik
chr6	149408787	149409848	chr6	149309414	149309415	1.39930317961247	2810474O19Rik
chr16	13940404	13941134	chr16	13986604	13986605	2.33613286063258	2900011O08Rik
chr5	113031548	113031812	chr5	113163351	113163352	1.60494566464298	2900026A02Rik
chr5	113041675	113041968	chr5	113163351	113163352	3.08636249849045	2900026A02Rik
chr5	113209058	113209573	chr5	113163351	113163352	6.68734367346824	2900026A02Rik
chr5	113226584	113227156	chr5	113163351	113163352	2.28516470203503	2900026A02Rik
chr5	113280697	113280992	chr5	113163351	113163352	2.36787213817829	2900026A02Rik
chr18	40256846	40257319	chr18	40256962	40256963	1.69767594209622	2900055J20Rik
chr18	40386318	40386912	chr18	40256962	40256963	2.65996290508209	2900055J20Rik
chr4	124486057	124486601	chr4	124610803	124610804	1.415013806169	3100002H09Rik
chr4	124656998	124658066	chr4	124610803	124610804	1.55865824278671	3100002H09Rik
chr18	11955940	11956427	chr18	12168717	12168718	2.52338587645258	3110002H16Rik
chr18	12024268	12024667	chr18	12168717	12168718	1.52367106303468	3110002H16Rik
chr1	119895242	119895442	chr1	120121187	120121188	1.81736240530598	3110009E18Rik
chr1	119902623	119903084	chr1	120121187	120121188	2.09899193500573	3110009E18Rik
chr1	119929796	119930212	chr1	120121187	120121188	1.96670390070991	3110009E18Rik
chr1	119954858	119955227	chr1	120121187	120121188	3.07540827570297	3110009E18Rik
chr1	120073800	120074309	chr1	120121187	120121188	2.02699906001088	3110009E18Rik
chr1	120357376	120357858	chr1	120121187	120121188	3.94179923706605	3110009E18Rik
chr4	108878929	108880011	chr4	108719649	108719650	1.69629908538779	3110021N24Rik
chr1	9382880	9383229	chr1	9601199	9601200	2.09289982193967	3110035E14Rik
chr1	9564259	9565016	chr1	9601199	9601200	5.16688073718954	3110035E14Rik
chr1	9578643	9579043	chr1	9601199	9601200	6.0867419361164	3110035E14Rik
chr1	9584143	9584431	chr1	9601199	9601200	2.68229182684228	3110035E14Rik
chr1	9601245	9602216	chr1	9601199	9601200	3.32209910782142	3110035E14Rik
chr1	9608069	9608338	chr1	9601199	9601200	1.39669452577502	3110035E14Rik
chr1	9622838	9623091	chr1	9601199	9601200	1.9225011799704	3110035E14Rik
chr7	81647160	81647609	chr7	81789478	81789479	1.45219703316637	3110040N11Rik
chr7	81710362	81710562	chr7	81789478	81789479	3.50568293562584	3110040N11Rik
chr7	81972114	81972328	chr7	81789478	81789479	1.32029695697457	3110040N11Rik
chr4	35006769	35007580	chr4	35226175	35226176	6.25514507157963	3110043O21Rik
chr4	35082392	35082959	chr4	35226175	35226176	1.86584729092958	3110043O21Rik
chr6	34887275	34887805	chr6	34878060	34878061	1.92443783828164	3110062M04Rik
chr13	119731799	119732404	chr13	119488383	119488384	1.72345474572622	3110070M22Rik
chr5	139429959	139430574	chr5	139460502	139460503	1.48059313992938	3110082I17Rik
chr5	30105782	30106453	chr5	30105359	30105360	5.5223025302302	3110082J24Rik
chr5	30111211	30111635	chr5	30105359	30105360	1.41990568042555	3110082J24Rik
chr5	30243951	30244257	chr5	30105359	30105360	1.46052740832542	3110082J24Rik
chr14	49568480	49569005	chr14	49783383	49783384	3.04257454614882	3632451O06Rik
chr14	49682566	49683376	chr14	49783383	49783384	1.5857696356956	3632451O06Rik
chr14	12144234	12144587	chr14	12284209	12284210	2.23010210094186	3830406C13Rik
chr19	28827757	28828303	chr19	28967800	28967801	1.40229465455472	4430402I18Rik
chr19	28892513	28892788	chr19	28967800	28967801	2.37811242635452	4430402I18Rik
chr19	29024415	29025119	chr19	28967800	28967801	3.90746347546873	4430402I18Rik
chr3	89534919	89535276	chr3	89773240	89773241	6.33871130713948	4632404H12Rik
chr3	89559141	89559714	chr3	89773240	89773241	2.92392935596459	4632404H12Rik
chr3	89613746	89614448	chr3	89773240	89773241	2.89696080605871	4632404H12Rik
chr3	89622996	89623196	chr3	89773240	89773241	2.97602278888298	4632404H12Rik
chr3	89653320	89653980	chr3	89773240	89773241	1.4412057951843	4632404H12Rik
chr3	89677785	89678115	chr3	89773240	89773241	4.56276639525263	4632404H12Rik
chr3	89730516	89730914	chr3	89773240	89773241	2.36154335871655	4632404H12Rik
chr3	89872378	89872835	chr3	89773240	89773241	2.22317349652402	4632404H12Rik
chr7	25413368	25413638	chr7	25384805	25384806	2.38329810567309	4732471J01Rik
chr13	119408710	119409560	chr13	119462759	119462760	1.46033018454486	4833420G17Rik
chr13	54323216	54324025	chr13	54565435	54565436	1.73897711447143	4833439L19Rik
chr13	54788907	54790012	chr13	54565435	54565436	2.4505585868356	4833439L19Rik
chr6	50412245	50412773	chr6	50596632	50596633	1.32989891408058	4921507P07Rik
chr8	85424133	85424656	chr8	85432841	85432842	2.80973422251651	4921524J17Rik
chr11	4083572	4083839	chr11	3895098	3895099	1.73790556660278	4921536K21Rik
chr2	130664182	130664934	chr2	130906406	130906407	1.39627385940326	4930402H24Rik
chr10	81167753	81168279	chr10	81365816	81365817	1.66279319726665	4930404N11Rik
chr10	81252760	81253603	chr10	81365816	81365817	2.68135544153211	4930404N11Rik
chr10	81363592	81363866	chr10	81365816	81365817	1.81601636107677	4930404N11Rik
chr10	81407647	81407974	chr10	81365816	81365817	2.12305476274815	4930404N11Rik
chr10	81481633	81481974	chr10	81365816	81365817	2.71822666667111	4930404N11Rik
chr10	81544851	81545830	chr10	81365816	81365817	2.04723709540826	4930404N11Rik
chr12	104824693	104825063	chr12	104865330	104865331	2.04023715888941	4930408O17Rik
chr12	104896869	104897069	chr12	104865330	104865331	2.35455161603244	4930408O17Rik
chr12	104955258	104955935	chr12	104865330	104865331	1.3971623796791	4930408O17Rik
chr12	105019726	105020058	chr12	104865330	104865331	1.53549692651625	4930408O17Rik
chr2	9889345	9889847	chr2	9881252	9881253	1.63235698191354	4930412O13Rik
chr2	18778132	18778816	chr2	18998343	18998344	1.53008389447255	4930426L09Rik
chr2	19164420	19164813	chr2	18998343	18998344	8.76077154865796	4930426L09Rik
chr2	19235941	19236210	chr2	18998343	18998344	2.90966932751267	4930426L09Rik
chr8	84010088	84010294	chr8	84148025	84148026	1.45266549418217	4930432K21Rik
chr8	84126105	84126446	chr8	84148025	84148026	2.62214140060063	4930432K21Rik
chr11	58306995	58307999	chr11	58274799	58274800	1.65610848507663	4930438A08Rik
chr11	58330083	58331067	chr11	58274799	58274800	1.37932131053391	4930438A08Rik
chr1	16229622	16230139	chr1	16093325	16093326	2.41062112339897	4930444P10Rik
chr12	72741376	72741653	chr12	72940774	72940775	1.58400478606785	4930447C04Rik
chr12	72917819	72918408	chr12	72940774	72940775	3.48488569137493	4930447C04Rik
chr12	73150499	73150876	chr12	72940774	72940775	1.86576034734272	4930447C04Rik
chr14	8516587	8516787	chr14	8666240	8666241	1.3561286844304	4930452B06Rik
chr16	64626747	64626947	chr16	64771161	64771162	2.22791792572824	4930453N24Rik
chr19	5272538	5273688	chr19	5406740	5406741	1.55943517216742	4930481A15Rik
chr19	5490467	5491889	chr19	5406740	5406741	1.3386954744123	4930481A15Rik
chr19	5510206	5511066	chr19	5406740	5406741	2.6715122896709	4930481A15Rik
chr19	5567509	5568649	chr19	5406740	5406741	1.5382098722323	4930481A15Rik
chr19	5569029	5569247	chr19	5406740	5406741	1.38119430547451	4930481A15Rik
chr19	5637033	5638232	chr19	5406740	5406741	1.6167225648274	4930481A15Rik
chr18	70694516	70694977	chr18	70472480	70472481	3.30693352766164	4930503L19Rik
chr10	62208540	62209033	chr10	62449489	62449490	5.60338336135892	4930507D05Rik
chr2	156666403	156666797	chr2	156857946	156857947	2.30086819327514	4930518I15Rik
chr2	156693363	156693733	chr2	156857946	156857947	2.67208589224828	4930518I15Rik
chr2	156809676	156810004	chr2	156857946	156857947	2.12872361379029	4930518I15Rik
chr2	156841003	156841457	chr2	156857946	156857947	4.25558150304551	4930518I15Rik
chr2	156905206	156905419	chr2	156857946	156857947	1.37985165619302	4930518I15Rik
chr2	157040371	157041018	chr2	156857946	156857947	1.38607005514066	4930518I15Rik
chr2	157058594	157059233	chr2	156857946	156857947	2.79710343508877	4930518I15Rik
chr2	157077817	157078017	chr2	156857946	156857947	2.42299322867439	4930518I15Rik
chr5	109923381	109924010	chr5	109751886	109751887	1.57354992278781	4930522L14Rik
chr11	31753418	31754270	chr11	31965592	31965593	1.70735335556417	4930524B15Rik
chr11	31844052	31844322	chr11	31965592	31965593	1.8255889420479	4930524B15Rik
chr5	99801922	99802534	chr5	99979061	99979062	1.62508557443132	4930524J08Rik
chr5	99906233	99906825	chr5	99979061	99979062	1.45086455739516	4930524J08Rik
chr5	100079196	100079610	chr5	99979061	99979062	1.31394342690113	4930524J08Rik
chr8	49243269	49243529	chr8	49370886	49370887	1.468705481808	4930555F03Rik
chr8	49263572	49263942	chr8	49370886	49370887	1.3379657264098	4930555F03Rik
chr8	49462284	49462707	chr8	49370886	49370887	1.56788932357432	4930555F03Rik
chr1	162130978	162131657	chr1	161979636	161979637	2.53767232139494	4930558K02Rik
chr3	138130597	138131310	chr3	138186713	138186714	1.55100881251515	4930579F01Rik
chr3	79841684	79841884	chr3	79629079	79629080	3.80777389434447	4930579G24Rik
chr6	91832995	91833466	chr6	91914759	91914760	3.79654678243413	4930590J08Rik
chr6	91852607	91853084	chr6	91914759	91914760	1.55127279243896	4930590J08Rik
chr6	91963589	91964040	chr6	91914759	91914760	1.34800820379985	4930590J08Rik
chr6	91981458	91982117	chr6	91914759	91914760	2.01692734276855	4930590J08Rik
chr12	111064388	111064712	chr12	111184491	111184492	2.47288435986571	4930595D18Rik
chr12	111401498	111401975	chr12	111184491	111184492	1.98966400559692	4930595D18Rik
chr7	34123420	34123917	chr7	34313551	34313552	1.64978022957959	4931406P16Rik
chr7	34168075	34168944	chr7	34313551	34313552	1.34829987766574	4931406P16Rik
chr7	34233966	34234873	chr7	34313551	34313552	1.32151375339649	4931406P16Rik
chr7	34313097	34314169	chr7	34313551	34313552	2.67803424421366	4931406P16Rik
chr5	24416154	24416673	chr5	24555469	24555470	1.69815991801006	4931409K22Rik
chr5	24639164	24639595	chr5	24555469	24555470	1.58372942576764	4931409K22Rik
chr8	105254054	105254968	chr8	105289528	105289529	1.4706863272343	4931428F04Rik
chr8	105268468	105269254	chr8	105289528	105289529	2.25632344867327	4931428F04Rik
chr11	29788791	29789318	chr11	29825668	29825669	2.12011877332839	4931440F15Rik
chr3	36772127	36772347	chr3	36863106	36863107	4.54354415301378	4932438A13Rik
chr3	36810400	36811073	chr3	36863106	36863107	11.8708216744343	4932438A13Rik
chr3	36854132	36854408	chr3	36863106	36863107	1.31458711460951	4932438A13Rik
chr16	90891432	90891649	chr16	91095122	91095123	1.83601014567012	4932438H23Rik
chr16	91069177	91069547	chr16	91095122	91095123	1.88666261510937	4932438H23Rik
chr16	91225368	91225650	chr16	91095122	91095123	3.98986084700152	4932438H23Rik
chr16	91246516	91246798	chr16	91095122	91095123	2.50202723544826	4932438H23Rik
chr16	91305706	91305906	chr16	91095122	91095123	9.1085900040125	4932438H23Rik
chr16	91314323	91314847	chr16	91095122	91095123	3.30261868277444	4932438H23Rik
chr8	13539082	13539355	chr8	13705889	13705890	2.05163486148509	4932443I19Rik
chr8	13623201	13623573	chr8	13705889	13705890	5.80435568691859	4932443I19Rik
chr1	63678084	63678459	chr1	63769267	63769268	1.3564433509083	4933402D24Rik
chr10	20418645	20419205	chr10	20312294	20312295	1.36822631390076	4933406P04Rik
chr10	20492519	20493370	chr10	20312294	20312295	2.49111958531992	4933406P04Rik
chr10	93425565	93426153	chr10	93589413	93589414	1.32749640329135	4933408J17Rik
chr11	43411684	43411884	chr11	43587040	43587041	2.45235376569206	4933415A04Rik
chr11	43548172	43548510	chr11	43587040	43587041	5.62604707495812	4933415A04Rik
chr11	43575398	43576205	chr11	43587040	43587041	3.27523737961583	4933415A04Rik
chr11	43586577	43586798	chr11	43587040	43587041	1.30587311864522	4933415A04Rik
chr11	43626231	43627003	chr11	43587040	43587041	1.37237988131754	4933415A04Rik
chr11	72011263	72012051	chr11	72207459	72207460	5.48243437859339	4933427D14Rik
chr11	97289951	97290370	chr11	97500340	97500341	1.61216144443674	4933428G20Rik
chr11	97511559	97511759	chr11	97500340	97500341	1.33989916067447	4933428G20Rik
chr11	97546897	97547506	chr11	97500340	97500341	1.63307849556834	4933428G20Rik
chr11	97596516	97597030	chr11	97500340	97500341	2.22687324587985	4933428G20Rik
chr3	89959702	89959937	chr3	90051636	90051637	2.39686352164725	4933434E20Rik
chr3	89998038	89998340	chr3	90051636	90051637	1.68394497020055	4933434E20Rik
chr3	89998449	89999270	chr3	90051636	90051637	2.3255429750502	4933434E20Rik
chr3	90077485	90077814	chr3	90051636	90051637	1.69807517176479	4933434E20Rik
chr3	90220193	90220696	chr3	90051636	90051637	2.0862013188955	4933434E20Rik
chr3	90231432	90232286	chr3	90051636	90051637	2.3779642844074	4933434E20Rik
chr3	90247805	90248769	chr3	90051636	90051637	2.39642691665521	4933434E20Rik
chr3	90265121	90266349	chr3	90051636	90051637	3.5927184494722	4933434E20Rik
chr3	90272536	90272736	chr3	90051636	90051637	1.38484682684225	4933434E20Rik
chr7	125254188	125254779	chr7	125349772	125349773	4.03684470505617	4933440M02Rik
chr7	125358025	125358542	chr7	125349772	125349773	1.53494217803305	4933440M02Rik
chr7	125458797	125458997	chr7	125349772	125349773	1.88134820105143	4933440M02Rik
chr7	125558829	125559029	chr7	125349772	125349773	1.98732986646551	4933440M02Rik
chr15	84756597	84756975	chr15	84988551	84988552	2.86232030554912	5031439G07Rik
chr15	84828490	84828969	chr15	84988551	84988552	1.31362660985834	5031439G07Rik
chr15	84898835	84899227	chr15	84988551	84988552	3.01155745739673	5031439G07Rik
chr15	84960663	84961290	chr15	84988551	84988552	1.62183616750205	5031439G07Rik
chr15	84986848	84988631	chr15	84988551	84988552	1.43335712484221	5031439G07Rik
chr15	85148439	85148708	chr15	84988551	84988552	1.4461268204368	5031439G07Rik
chr15	85173457	85173882	chr15	84988551	84988552	7.28956697416788	5031439G07Rik
chr15	85201014	85201432	chr15	84988551	84988552	1.42048917760441	5031439G07Rik
chr3	108536447	108537781	chr3	108536536	108536537	1.35665602663164	5330417C22Rik
chr5	109556968	109559040	chr5	109691041	109691042	1.69799468983917	5430403G16Rik
chr11	81622520	81623258	chr11	81860673	81860674	1.67412987372834	5530401A14Rik
chr4	126503997	126504197	chr4	126609818	126609819	2.9604157745578	5730409E04Rik
chr4	126609689	126610274	chr4	126609818	126609819	2.30836773134842	5730409E04Rik
chr11	80294416	80294799	chr11	80378034	80378035	2.65722612786815	5730455P16Rik
chr11	80357681	80357924	chr11	80378034	80378035	1.68256186277708	5730455P16Rik
chr11	80580971	80581335	chr11	80378034	80378035	5.49822050883135	5730455P16Rik
chr11	26070907	26071109	chr11	26210763	26210764	2.01856067892931	5730522E02Rik
chr11	26089018	26089218	chr11	26210763	26210764	1.49478857088767	5730522E02Rik
chr11	26096274	26096705	chr11	26210763	26210764	2.92694576450173	5730522E02Rik
chr11	26103596	26104207	chr11	26210763	26210764	2.82250024034278	5730522E02Rik
chr11	26108867	26109158	chr11	26210763	26210764	2.29849038117916	5730522E02Rik
chr11	26120980	26121698	chr11	26210763	26210764	4.10342964961328	5730522E02Rik
chr1	136007554	136008307	chr1	136234264	136234265	2.37814163219321	5730559C18Rik
chr1	136051589	136051975	chr1	136234264	136234265	2.11497125590182	5730559C18Rik
chr1	136102981	136103533	chr1	136234264	136234265	3.72497569163129	5730559C18Rik
chr1	136140235	136140760	chr1	136234264	136234265	4.10062083332132	5730559C18Rik
chr1	136213023	136213303	chr1	136234264	136234265	2.65471532579003	5730559C18Rik
chr1	136234012	136234753	chr1	136234264	136234265	2.00886878920013	5730559C18Rik
chr1	136345354	136346603	chr1	136234264	136234265	1.55350896625744	5730559C18Rik
chr1	136466219	136466681	chr1	136234264	136234265	2.34444990765171	5730559C18Rik
chr6	51961201	51961509	chr6	52177498	52177499	1.44049684217479	5730596B20Rik
chr6	52102117	52102572	chr6	52177498	52177499	1.81642334976625	5730596B20Rik
chr6	52158250	52158746	chr6	52177498	52177499	3.3029841252959	5730596B20Rik
chr6	52165040	52165385	chr6	52177498	52177499	6.58368471980471	5730596B20Rik
chr6	52172495	52173091	chr6	52177498	52177499	22.9239811795738	5730596B20Rik
chr6	52192002	52192301	chr6	52177498	52177499	1.69498323022525	5730596B20Rik
chr6	52211593	52212063	chr6	52177498	52177499	2.27468593457326	5730596B20Rik
chr6	52229875	52230121	chr6	52177498	52177499	1.42060030948113	5730596B20Rik
chr6	52240432	52240857	chr6	52177498	52177499	1.78463431133503	5730596B20Rik
chr6	52316754	52317156	chr6	52177498	52177499	1.76484606404335	5730596B20Rik
chr6	52323334	52323534	chr6	52177498	52177499	2.22062759337665	5730596B20Rik
chr6	52418194	52418687	chr6	52177498	52177499	4.6098532544391	5730596B20Rik
chr8	33265734	33266327	chr8	33428709	33428710	4.3562082305028	5930422O12Rik
chr8	33418187	33418564	chr8	33428709	33428710	2.85801523609399	5930422O12Rik
chr8	33517156	33517778	chr8	33428709	33428710	1.80444558436236	5930422O12Rik
chr9	58355467	58355746	chr9	58488603	58488604	2.02498874558166	6030419C18Rik
chr9	58374354	58374658	chr9	58488603	58488604	4.09161562662506	6030419C18Rik
chr9	58404201	58404712	chr9	58488603	58488604	1.33609409868947	6030419C18Rik
chr9	58421836	58422505	chr9	58488603	58488604	9.91959588599523	6030419C18Rik
chr9	58437710	58438204	chr9	58488603	58488604	3.99952376093143	6030419C18Rik
chr9	58447072	58447327	chr9	58488603	58488604	1.5494243066279	6030419C18Rik
chr9	58457753	58458132	chr9	58488603	58488604	4.45737320771573	6030419C18Rik
chr9	58467260	58467840	chr9	58488603	58488604	2.97582141087547	6030419C18Rik
chr9	58513926	58514322	chr9	58488603	58488604	5.81471979770284	6030419C18Rik
chr9	58527811	58528189	chr9	58488603	58488604	1.99573848221524	6030419C18Rik
chr9	58535990	58536237	chr9	58488603	58488604	1.66790700944542	6030419C18Rik
chr4	136373696	136373896	chr4	136462250	136462251	1.35829847778085	6030445D17Rik
chr15	12875720	12876274	chr15	12824657	12824658	2.37513711977137	6030458C11Rik
chr15	12922658	12922993	chr15	12824657	12824658	2.39414853583279	6030458C11Rik
chrX	38734897	38735097	chrX	38772671	38772672	1.73146114898655	6030498E09Rik
chrX	38809481	38809870	chrX	38772671	38772672	1.64245054781267	6030498E09Rik
chr2	32581497	32582012	chr2	32741016	32741017	1.72563545287223	6330409D20Rik
chr2	32750862	32751883	chr2	32741016	32741017	1.89820302771884	6330409D20Rik
chr2	32756979	32758015	chr2	32741016	32741017	1.38145631410962	6330409D20Rik
chr2	32928448	32928811	chr2	32741016	32741017	1.51901433676183	6330409D20Rik
chr2	32966757	32967811	chr2	32741016	32741017	1.6159882806529	6330409D20Rik
chr7	139835689	139835914	chr7	139978755	139978756	1.70526434106176	6430531B16Rik
chr7	139949874	139950312	chr7	139978755	139978756	4.10150704435488	6430531B16Rik
chr7	140048154	140048539	chr7	139978755	139978756	2.10190157568972	6430531B16Rik
chr7	140057681	140058650	chr7	139978755	139978756	1.89150591248789	6430531B16Rik
chr8	120127048	120127276	chr8	120114152	120114153	3.99672715956598	6430548M08Rik
chr8	120177358	120178025	chr8	120114152	120114153	2.49498218278982	6430548M08Rik
chr8	120251146	120251584	chr8	120114152	120114153	3.67904018506304	6430548M08Rik
chr8	120295536	120295736	chr8	120114152	120114153	1.9077372225979	6430548M08Rik
chr8	120307120	120307584	chr8	120114152	120114153	3.03337884981804	6430548M08Rik
chr8	120353638	120354019	chr8	120114152	120114153	1.76212224868883	6430548M08Rik
chr8	120356369	120356644	chr8	120114152	120114153	2.52207260284943	6430548M08Rik
chr9	107255885	107256085	chr9	107340602	107340603	1.65789953987773	6430571L13Rik
chr9	107359196	107359396	chr9	107340602	107340603	1.51231781173269	6430571L13Rik
chr9	107377932	107378692	chr9	107340602	107340603	1.45891671667558	6430571L13Rik
chr9	107463587	107464034	chr9	107340602	107340603	1.82416022634194	6430571L13Rik
chr9	107464261	107464632	chr9	107340602	107340603	1.38145356712473	6430571L13Rik
chr9	107526566	107527580	chr9	107340602	107340603	3.04345024070836	6430571L13Rik
chr9	107554331	107555041	chr9	107340602	107340603	1.53630701570032	6430571L13Rik
chr8	36274344	36274648	chr8	36457548	36457549	5.2406091979254	6430573F11Rik
chr8	36283433	36283812	chr8	36457548	36457549	3.84034400845603	6430573F11Rik
chr8	36378407	36378828	chr8	36457548	36457549	2.69772126386922	6430573F11Rik
chr8	36378848	36379048	chr8	36457548	36457549	2.03768388245933	6430573F11Rik
chr8	36381586	36381952	chr8	36457548	36457549	4.82873329264821	6430573F11Rik
chr8	36420192	36420392	chr8	36457548	36457549	1.64933025359669	6430573F11Rik
chr8	36446324	36446875	chr8	36457548	36457549	4.38603275405629	6430573F11Rik
chr8	36457644	36458698	chr8	36457548	36457549	3.86376509641317	6430573F11Rik
chr8	36459347	36459547	chr8	36457548	36457549	2.15741985765687	6430573F11Rik
chr8	36484469	36485184	chr8	36457548	36457549	5.68816762200585	6430573F11Rik
chr8	36485405	36485605	chr8	36457548	36457549	3.51460013135296	6430573F11Rik
chr8	36503914	36504741	chr8	36457548	36457549	34.6403406856513	6430573F11Rik
chr8	36578116	36578481	chr8	36457548	36457549	2.25256143944339	6430573F11Rik
chr8	36659014	36659214	chr8	36457548	36457549	1.9501901042803	6430573F11Rik
chr8	36682031	36682348	chr8	36457548	36457549	7.91588261484351	6430573F11Rik
chr6	27979112	27979543	chr6	28215555	28215556	11.0130587583058	6530409C15Rik
chr6	28135158	28135471	chr6	28215555	28215556	2.1750851000369	6530409C15Rik
chr6	28260977	28262561	chr6	28215555	28215556	3.43056226360565	6530409C15Rik
chr6	28342868	28343155	chr6	28215555	28215556	1.43473811872648	6530409C15Rik
chr6	28421572	28422112	chr6	28215555	28215556	1.3704951431057	6530409C15Rik
chr2	152396245	152396716	chr2	152415587	152415588	3.07332810345457	6820408C15Rik
chr2	152397981	152398532	chr2	152415587	152415588	1.75924979083308	6820408C15Rik
chr2	152398668	152399540	chr2	152415587	152415588	2.04159031026005	6820408C15Rik
chr2	152427535	152428004	chr2	152415587	152415588	2.91003258988697	6820408C15Rik
chr2	152600359	152600559	chr2	152415587	152415588	2.22436035090635	6820408C15Rik
chr18	77713178	77713378	chr18	77714010	77714011	1.51304762045052	8030462N17Rik
chr10	42968550	42968817	chr10	43174704	43174705	1.92662105031999	9030612E09Rik
chr10	43027055	43027537	chr10	43174704	43174705	1.52429460182226	9030612E09Rik
chr10	43028151	43028351	chr10	43174704	43174705	2.82869365775808	9030612E09Rik
chr10	43061841	43062184	chr10	43174704	43174705	5.8469107386112	9030612E09Rik
chr10	43073477	43073725	chr10	43174704	43174705	2.19095816857807	9030612E09Rik
chr10	43106333	43106692	chr10	43174704	43174705	4.88666759932192	9030612E09Rik
chr10	43162377	43162938	chr10	43174704	43174705	2.34807930018832	9030612E09Rik
chr10	43180594	43181166	chr10	43174704	43174705	11.6247665291991	9030612E09Rik
chr10	43311054	43311486	chr10	43174704	43174705	2.03721764420799	9030612E09Rik
chr17	40992246	40992777	chr17	40880558	40880559	1.80640655952084	9130008F23Rik
chr19	45867709	45868265	chr19	45998488	45998489	1.9502106479167	9130011E15Rik
chr7	128215170	128215497	chr7	128238031	128238032	3.9114146703093	9130023H24Rik
chr11	68947254	68948103	chr11	69122589	69122590	1.4091715827096	9130213A22Rik
chr11	69037126	69037682	chr11	69122589	69122590	1.83577388126604	9130213A22Rik
chr11	69041070	69041541	chr11	69122589	69122590	1.54014924348674	9130213A22Rik
chr11	69059345	69060069	chr11	69122589	69122590	1.89097779448909	9130213A22Rik
chr11	69118716	69119133	chr11	69122589	69122590	2.0463772637237	9130213A22Rik
chr11	69124021	69124575	chr11	69122589	69122590	1.95290310608025	9130213A22Rik
chr11	69331976	69332635	chr11	69122589	69122590	2.53906448119015	9130213A22Rik
chr2	9887678	9888241	chr2	9889540	9889541	9.60900654314463	9230102O04Rik
chr2	9892647	9893313	chr2	9889540	9889541	5.09787856417401	9230102O04Rik
chr2	9895019	9895246	chr2	9889540	9889541	2.59135411539606	9230102O04Rik
chr2	9897939	9898322	chr2	9889540	9889541	1.73443853408406	9230102O04Rik
chr12	112929736	112930571	chr12	112999964	112999965	1.39499730395896	9230104M06Rik
chr12	113218119	113218365	chr12	112999964	112999965	1.5669261909864	9230104M06Rik
chr10	29143521	29144416	chr10	29211643	29211644	1.78495526905001	9330159F19Rik
chr10	29321700	29321999	chr10	29211643	29211644	1.87613932221421	9330159F19Rik
chr12	103202701	103203385	chr12	103407820	103407821	1.79505637071576	9330161L09Rik
chr7	79465969	79467128	chr7	79710283	79710284	1.99804919210532	9330171B17Rik
chr7	79531816	79532089	chr7	79710283	79710284	1.83667132775957	9330171B17Rik
chr7	79543361	79544156	chr7	79710283	79710284	1.36320005517584	9330171B17Rik
chr7	79742893	79743492	chr7	79710283	79710284	1.82803090813594	9330171B17Rik
chr5	9069857	9070398	chr5	9266118	9266119	2.12067421293979	9330182L06Rik
chr5	9345340	9345758	chr5	9266118	9266119	2.17511135254639	9330182L06Rik
chr7	137202623	137203090	chr7	137410762	137410763	7.45434945043956	9430038I01Rik
chr7	137206613	137207237	chr7	137410762	137410763	6.18910117043457	9430038I01Rik
chr7	137255898	137256452	chr7	137410762	137410763	1.94707663372761	9430038I01Rik
chr7	137296666	137297187	chr7	137410762	137410763	10.2767007848406	9430038I01Rik
chr7	137314216	137314941	chr7	137410762	137410763	3.22185744146574	9430038I01Rik
chr7	137410333	137411391	chr7	137410762	137410763	1.45807823547199	9430038I01Rik
chr7	137452211	137452630	chr7	137410762	137410763	8.61879382956046	9430038I01Rik
chr7	137468403	137468682	chr7	137410762	137410763	1.3358668188903	9430038I01Rik
chr7	137490214	137491070	chr7	137410762	137410763	1.93306760598893	9430038I01Rik
chr7	137596450	137596675	chr7	137410762	137410763	1.76094659954356	9430038I01Rik
chr7	137617390	137617635	chr7	137410762	137410763	2.71107018973909	9430038I01Rik
chr7	137651666	137652123	chr7	137410762	137410763	6.24875000172809	9430038I01Rik
chr2	32581497	32582012	chr2	32575684	32575685	1.58189175017701	9430097D07Rik
chr11	52231723	52232634	chr11	52396428	52396429	1.38381148502638	9530068E07Rik
chr11	52343403	52343627	chr11	52396428	52396429	1.38368578659383	9530068E07Rik
chr9	22188122	22188646	chr9	22411577	22411578	1.44576151090975	9530077C05Rik
chr9	22368223	22368583	chr9	22411577	22411578	1.76610208022539	9530077C05Rik
chr9	22467353	22468694	chr9	22411577	22411578	2.55725051306471	9530077C05Rik
chr9	22641251	22641528	chr9	22411577	22411578	1.70937038402274	9530077C05Rik
chr14	69939111	69939656	chr14	70159502	70159503	2.89262137907466	9930012K11Rik
chr14	70009159	70009846	chr14	70159502	70159503	2.07571526062628	9930012K11Rik
chr14	70080461	70080661	chr14	70159502	70159503	2.7707001509568	9930012K11Rik
chr14	70099886	70100614	chr14	70159502	70159503	2.18722858284184	9930012K11Rik
chr14	70159156	70159761	chr14	70159502	70159503	2.47354184500493	9930012K11Rik
chr19	29825221	29825538	chr19	29805989	29805990	1.61521707002511	9930021J03Rik
chr1	193386159	193386659	chr1	193168046	193168047	1.98322610396644	A130010J15Rik
chr15	95823839	95824039	chr15	95791642	95791643	2.60236060312529	A130051J06Rik
chr15	95828892	95829124	chr15	95791642	95791643	1.4195857977919	A130051J06Rik
chr15	95843556	95843756	chr15	95791642	95791643	2.11913241032874	A130051J06Rik
chr15	95931312	95931877	chr15	95791642	95791643	3.35714839645803	A130051J06Rik
chr15	96038011	96038531	chr15	95791642	95791643	2.74132492650751	A130051J06Rik
chr9	20664050	20664862	chr9	20868642	20868643	8.70723004237077	A230050P20Rik
chr9	20666005	20666361	chr9	20868642	20868643	3.5712205406628	A230050P20Rik
chr9	20692378	20692686	chr9	20868642	20868643	7.15808412856328	A230050P20Rik
chr9	20726368	20726671	chr9	20868642	20868643	2.08618103506784	A230050P20Rik
chr9	20751735	20752100	chr9	20868642	20868643	2.19662645838488	A230050P20Rik
chr9	20868737	20869036	chr9	20868642	20868643	5.41474142303736	A230050P20Rik
chr9	20975449	20975890	chr9	20868642	20868643	2.82457457682111	A230050P20Rik
chr9	21002441	21003627	chr9	20868642	20868643	2.25279546823001	A230050P20Rik
chr9	21030994	21032354	chr9	20868642	20868643	4.00692889999982	A230050P20Rik
chr8	12126383	12127119	chr8	12278819	12278820	3.23652747600264	A230072I06Rik
chr8	12188778	12189430	chr8	12278819	12278820	2.08059581900693	A230072I06Rik
chr8	12264133	12264647	chr8	12278819	12278820	2.6526422948351	A230072I06Rik
chr8	12290799	12290999	chr8	12278819	12278820	2.13012508995757	A230072I06Rik
chr8	12385132	12385775	chr8	12278819	12278820	2.89571811695738	A230072I06Rik
chr6	124847398	124847844	chr6	124916863	124916864	1.50671046638261	A230083G16Rik
chr6	125071785	125072290	chr6	124916863	124916864	2.44105419998911	A230083G16Rik
chr6	121402313	121403392	chr6	121636173	121636174	2.07792809009123	A2m
chr6	121501448	121501795	chr6	121636173	121636174	2.21171162428806	A2m
chr6	121513720	121514097	chr6	121636173	121636174	1.83990824030511	A2m
chr6	121556690	121556890	chr6	121636173	121636174	1.5480495537298	A2m
chr6	121648297	121649027	chr6	121636173	121636174	7.03781197463986	A2m
chr8	99234604	99234912	chr8	99416642	99416643	2.91044815535291	A330008L17Rik
chr8	99267205	99267405	chr8	99416642	99416643	2.25207866496881	A330008L17Rik
chr8	99369407	99369687	chr8	99416642	99416643	2.33508767788587	A330008L17Rik
chr8	99415869	99416912	chr8	99416642	99416643	5.00440150249144	A330008L17Rik
chr5	130307617	130308362	chr5	130384631	130384632	2.73502322515817	A330070K13Rik
chr5	130555662	130555883	chr5	130384631	130384632	4.68458216457031	A330070K13Rik
chr4	128617548	128617860	chr4	128755364	128755365	1.49349150788851	A3galt2
chr4	128689736	128689957	chr4	128755364	128755365	3.24793039004812	A3galt2
chr4	128734228	128734718	chr4	128755364	128755365	1.47254762768737	A3galt2
chr4	128919329	128919535	chr4	128755364	128755365	1.52727811770763	A3galt2
chr4	128947589	128947989	chr4	128755364	128755365	1.31186970609669	A3galt2
chr4	128966971	128967254	chr4	128755364	128755365	4.3082900457143	A3galt2
chr4	153806412	153807452	chr4	153957237	153957238	1.42443173957796	A430005L14Rik
chr4	153822213	153822478	chr4	153957237	153957238	1.65001037596859	A430005L14Rik
chr4	153868039	153868790	chr4	153957237	153957238	3.09914511993112	A430005L14Rik
chr4	154170870	154171463	chr4	153957237	153957238	1.42604797244855	A430005L14Rik
chr5	138761918	138762370	chr5	138622859	138622860	2.70293489509384	A430033K04Rik
chr5	138778684	138779309	chr5	138622859	138622860	1.47930962947843	A430033K04Rik
chr2	118762336	118763153	chr2	118762661	118762662	1.3587387032962	A430105I19Rik
chr12	112252262	112252502	chr12	112489448	112489449	2.11559146924954	A530016L24Rik
chr12	112263932	112264132	chr12	112489448	112489449	1.5167479407854	A530016L24Rik
chr12	112291984	112292273	chr12	112489448	112489449	2.67143824317826	A530016L24Rik
chr12	112392525	112392931	chr12	112489448	112489449	4.95488628716509	A530016L24Rik
chr12	112398479	112398689	chr12	112489448	112489449	4.74478128153572	A530016L24Rik
chr12	112406062	112406299	chr12	112489448	112489449	4.60546586615237	A530016L24Rik
chr12	112435444	112435771	chr12	112489448	112489449	2.43095957410438	A530016L24Rik
chr4	108699350	108699759	chr4	108848619	108848620	1.47347929638325	A730015C16Rik
chr4	108718687	108719117	chr4	108848619	108848620	2.87167281279465	A730015C16Rik
chr4	108789770	108790064	chr4	108848619	108848620	4.206072105409	A730015C16Rik
chr4	108812698	108813269	chr4	108848619	108848620	2.17003005272211	A730015C16Rik
chr4	108899396	108899734	chr4	108848619	108848620	2.06122371077409	A730015C16Rik
chr4	108943183	108943481	chr4	108848619	108848620	2.31930273538075	A730015C16Rik
chr4	108943730	108944162	chr4	108848619	108848620	2.84283837162074	A730015C16Rik
chr18	59278727	59279597	chr18	59062248	59062249	3.52743004403371	A730017C20Rik
chr3	121448396	121448638	chr3	121643485	121643486	1.5065847367958	A730020M07Rik
chr3	121448887	121449140	chr3	121643485	121643486	1.44172480857812	A730020M07Rik
chr3	121619526	121619860	chr3	121643485	121643486	1.55185313330058	A730020M07Rik
chr3	121643498	121643838	chr3	121643485	121643486	1.98116275495483	A730020M07Rik
chr13	48497717	48498458	chr13	48513570	48513571	2.06737532006091	A830005F24Rik
chr13	48655847	48656085	chr13	48513570	48513571	1.70977417874957	A830005F24Rik
chr2	17839005	17839560	chr2	18037737	18037738	2.29578465304831	A930004D18Rik
chr2	18056395	18057741	chr2	18037737	18037738	1.41600210041413	A930004D18Rik
chr10	115362056	115362850	chr10	115569986	115569987	1.96229734059663	A930009A15Rik
chr10	115385562	115385762	chr10	115569986	115569987	2.76209814603286	A930009A15Rik
chr10	115468925	115469457	chr10	115569986	115569987	5.28522200304744	A930009A15Rik
chr10	115478644	115478866	chr10	115569986	115569987	1.76657188642316	A930009A15Rik
chr7	19619094	19619956	chr7	19421417	19421418	1.34248614517641	A930016O22Rik
chr10	69084616	69084816	chr10	69213098	69213099	1.62255844928093	A930033H14Rik
chr10	69088425	69088625	chr10	69213098	69213099	1.96605174304629	A930033H14Rik
chr10	69186167	69186726	chr10	69213098	69213099	1.35651020956403	A930033H14Rik
chr10	69314018	69314345	chr10	69213098	69213099	3.98495627091961	A930033H14Rik
chr10	69327889	69329122	chr10	69213098	69213099	2.90225313655854	A930033H14Rik
chr10	69338564	69339133	chr10	69213098	69213099	4.20284035841501	A930033H14Rik
chr2	122472936	122473293	chr2	122636986	122636987	2.41106546443536	AA467197
chr2	122630607	122631817	chr2	122636986	122636987	1.93815944453961	AA467197
chr1	130715541	130716387	chr1	130731976	130731977	3.48558413523611	AA986860
chr1	130790188	130790461	chr1	130731976	130731977	2.57917069821021	AA986860
chr4	138250120	138251074	chr4	138395198	138395199	2.43277289300627	AB041806
chr4	138585016	138585392	chr4	138395198	138395199	1.65944767235419	AB041806
chr9	89462000	89462200	chr9	89623125	89623126	3.90697928251328	AF529169
chr9	89496590	89497712	chr9	89623125	89623126	10.7022277548561	AF529169
chr9	89533146	89533346	chr9	89623125	89623126	2.20825187073517	AF529169
chr9	89568135	89568396	chr9	89623125	89623126	2.76578353835823	AF529169
chr9	89611030	89611622	chr9	89623125	89623126	1.61008836348558	AF529169
chr9	89622532	89623763	chr9	89623125	89623126	6.05452014784801	AF529169
chr9	89640848	89641385	chr9	89623125	89623126	1.78314354419179	AF529169
chr9	89704489	89705447	chr9	89623125	89623126	1.4546574576536	AF529169
chr9	89717536	89717936	chr9	89623125	89623126	2.7841417496874	AF529169
chr9	89727577	89727871	chr9	89623125	89623126	2.18408325757848	AF529169
chr9	89738237	89738747	chr9	89623125	89623126	1.50331475854542	AF529169
chr9	89781761	89782281	chr9	89623125	89623126	3.90864691423249	AF529169
chr9	89799023	89799358	chr9	89623125	89623126	3.60776627573092	AF529169
chr9	89813727	89814247	chr9	89623125	89623126	2.53824719987642	AF529169
chr9	89821219	89822109	chr9	89623125	89623126	9.224453902167	AF529169
chr9	89849998	89850349	chr9	89623125	89623126	4.67865735918119	AF529169
chr9	89858261	89858485	chr9	89623125	89623126	1.98430639667493	AF529169
chr2	35200475	35201547	chr2	35101543	35101544	2.81031653385869	AI182371
chr2	35256123	35256715	chr2	35101543	35101544	1.42890999243837	AI182371
chr4	58737322	58737745	chr4	58912749	58912750	1.38154932265729	AI314180
chr4	58943452	58944368	chr4	58912749	58912750	3.13800053981289	AI314180
chr4	59058967	59059733	chr4	58912749	58912750	1.50464572609387	AI314180
chr17	27480235	27481051	chr17	27565749	27565750	3.59983221184502	AI413582
chr17	27564807	27565018	chr17	27565749	27565750	1.77464709547588	AI413582
chr17	27684992	27685952	chr17	27565749	27565750	1.41622692513523	AI413582
chr17	27702651	27703020	chr17	27565749	27565750	1.6866322459664	AI413582
chr17	27718341	27718735	chr17	27565749	27565750	1.43554277497204	AI413582
chr17	27726817	27727017	chr17	27565749	27565750	2.41298061464287	AI413582
chr4	41503163	41503619	chr4	41503076	41503077	1.99530369573167	AI464131
chr4	41614160	41614609	chr4	41503076	41503077	1.3706839719167	AI464131
chr4	41631638	41631931	chr4	41503076	41503077	1.67727494591646	AI464131
chr4	41677628	41677843	chr4	41503076	41503077	2.37142076574379	AI464131
chr4	41697670	41697892	chr4	41503076	41503077	1.55134249906928	AI464131
chr9	52678684	52678917	chr9	52679429	52679430	1.57603795841944	AI593442
chr1	43163471	43164449	chr1	43098710	43098711	1.60396645071921	AI597479
chr19	41673010	41673405	chr19	41593363	41593364	1.45948106598204	AI606181
chr19	41820695	41821084	chr19	41593363	41593364	2.51565078366071	AI606181
chr19	5223287	5223538	chr19	5425157	5425158	1.91509681611002	AI837181
chr9	50422406	50422837	chr9	50617464	50617465	1.3635440381614	AU019823
chr4	119005193	119005484	chr4	119232712	119232713	1.5816391902655	AU022252
chr4	119338575	119339371	chr4	119232712	119232713	1.57163556797705	AU022252
chrX	6159555	6159943	chrX	6083419	6083420	4.02712832324879	AU022751
chr4	126619906	126620667	chr4	126753544	126753545	1.3508463997521	AU040320
chr10	82127945	82128596	chr10	82138253	82138254	2.29293569925836	AU041133
chr4	155962485	155962883	chr4	156203304	156203305	3.09373868339991	AW011738
chr15	3979068	3979995	chr15	3995752	3995753	2.0929417910527	AW549877
chr15	3995539	3996375	chr15	3995752	3995753	3.68626077656672	AW549877
chr9	39557751	39558335	chr9	39604403	39604404	1.82200929172541	AW551984
chr9	39604258	39604553	chr9	39604403	39604404	1.79356535136395	AW551984
chr9	39633967	39634766	chr9	39604403	39604404	5.90925272283854	AW551984
chr9	39654828	39655317	chr9	39604403	39604404	5.70003628892235	AW551984
chr9	39679322	39680014	chr9	39604403	39604404	3.45221529400138	AW551984
chr9	39755855	39756193	chr9	39604403	39604404	2.43052671426747	AW551984
chr9	39756485	39756709	chr9	39604403	39604404	3.65152221608776	AW551984
chr9	54830852	54831091	chr9	54950998	54950999	4.19051977296525	AY074887
chr15	102116875	102117398	chr15	102350759	102350760	1.96262090332574	Aaas
chr15	102147105	102147371	chr15	102350759	102350760	1.43674818254754	Aaas
chr15	102287645	102287855	chr15	102350759	102350760	1.43455141687502	Aaas
chr15	102583818	102584619	chr15	102350759	102350760	1.43015375756786	Aaas
chr5	125264689	125265233	chr5	125475814	125475815	1.98835194316101	Aacs
chr5	125405505	125407013	chr5	125475814	125475815	1.94945589735631	Aacs
chr5	125533328	125533587	chr5	125475814	125475815	1.75493992255118	Aacs
chr5	125563619	125564038	chr5	125475814	125475815	2.02290978235754	Aacs
chr5	125631631	125632352	chr5	125475814	125475815	5.99006487231243	Aacs
chr5	125692372	125693028	chr5	125475814	125475815	3.30367903572939	Aacs
chr8	60347132	60347772	chr8	60506124	60506125	6.15115145422004	Aadat
chr8	60617018	60617402	chr8	60506124	60506125	1.3360701916954	Aadat
chr9	63361927	63362261	chr9	63602655	63602656	1.36760359725905	Aagab
chr9	63532911	63533504	chr9	63602655	63602656	3.23128303429497	Aagab
chr9	63745957	63746488	chr9	63602655	63602656	2.02103847045953	Aagab
chr9	63785254	63785548	chr9	63602655	63602656	1.53775226212536	Aagab
chr6	86809803	86810293	chr6	86849517	86849518	2.15732702019438	Aak1
chr6	86886831	86887031	chr6	86849517	86849518	1.42886240986852	Aak1
chr6	86887123	86887328	chr6	86849517	86849518	1.35071100964633	Aak1
chr7	97430070	97430287	chr7	97579497	97579498	3.95785176065073	Aamdc
chr7	97446628	97447441	chr7	97579497	97579498	7.75451818000671	Aamdc
chr7	97512530	97512931	chr7	97579497	97579498	3.41282834122877	Aamdc
chr7	97642783	97642983	chr7	97579497	97579498	1.61856882514249	Aamdc
chr1	74036761	74037474	chr1	74284738	74284739	2.42350638686942	Aamp
chr1	74096609	74096946	chr1	74284738	74284739	5.95906786285394	Aamp
chr1	74200933	74201431	chr1	74284738	74284739	2.83070484078429	Aamp
chr11	116476413	116476613	chr11	116586432	116586433	5.10938008675422	Aanat
chr11	116515610	116515894	chr11	116586432	116586433	1.90366964553165	Aanat
chr11	116534438	116534701	chr11	116586432	116586433	1.84377967242593	Aanat
chr11	116554541	116554996	chr11	116586432	116586433	1.48543177974209	Aanat
chr11	116587013	116587561	chr11	116586432	116586433	1.98872831670522	Aanat
chr11	116589159	116589701	chr11	116586432	116586433	12.6074828116814	Aanat
chr11	116592546	116593016	chr11	116586432	116586433	1.76503555647662	Aanat
chr11	116628868	116629279	chr11	116586432	116586433	1.57776539185776	Aanat
chr11	116671231	116671991	chr11	116586432	116586433	1.40109657414235	Aanat
chr11	116694454	116695130	chr11	116586432	116586433	1.53038099004126	Aanat
chr11	116811325	116812017	chr11	116586432	116586433	1.74397276750329	Aanat
chr2	156401176	156401805	chr2	156547584	156547585	2.12522540997036	Aar2
chr2	156669497	156669891	chr2	156547584	156547585	1.97185855849976	Aar2
chr15	51822719	51822978	chr15	52040107	52040108	1.9695984348462	Aard
chr15	51823042	51823493	chr15	52040107	52040108	3.12785065624503	Aard
chr15	52160664	52161389	chr15	52040107	52040108	1.42017245460226	Aard
chr15	52281421	52281796	chr15	52040107	52040108	6.14068920959639	Aard
chr8	110964511	110965099	chr8	111033144	111033145	2.84515612006098	Aars
chr8	110997673	110998639	chr8	111033144	111033145	1.38483634621604	Aars
chr8	111027421	111028157	chr8	111033144	111033145	1.84264959484246	Aars
chr8	111094216	111094978	chr8	111033144	111033145	2.9002080179498	Aars
chr17	45383421	45383659	chr17	45506841	45506842	4.35191631080008	Aars2
chr17	45754523	45755039	chr17	45506841	45506842	1.9152723763241	Aars2
chr11	101485680	101486028	chr11	101417615	101417616	1.61079776458435	Aarsd1
chr5	76773775	76774029	chr5	76905514	76905515	1.32651994291376	Aasdh
chr5	77115365	77115565	chr5	76905514	76905515	1.72031595196952	Aasdh
chr11	84272129	84272445	chr11	84513522	84513523	1.54672661449851	Aatf
chr11	84293315	84293784	chr11	84513522	84513523	3.04256950266649	Aatf
chr11	84369432	84369697	chr11	84513522	84513523	1.4938858234121	Aatf
chr11	84382621	84382913	chr11	84513522	84513523	1.42256113192413	Aatf
chr11	84402090	84402323	chr11	84513522	84513523	5.65048801865397	Aatf
chr11	84481695	84482216	chr11	84513522	84513523	3.43280364276585	Aatf
chr11	84513267	84514061	chr11	84513522	84513523	2.05268964262189	Aatf
chr11	84525153	84525363	chr11	84513522	84513523	1.38575181894432	Aatf
chr11	84525458	84525919	chr11	84513522	84513523	7.12300701742617	Aatf
chr11	84563044	84563959	chr11	84513522	84513523	1.71373608167369	Aatf
chr11	84599347	84599814	chr11	84513522	84513523	1.31308133662945	Aatf
chr11	84726212	84726723	chr11	84513522	84513523	2.46697215656664	Aatf
chr11	119811136	119811539	chr11	120047167	120047168	3.56600643582823	Aatk
chr11	119839567	119840702	chr11	120047167	120047168	2.68542304114377	Aatk
chr11	119856210	119856596	chr11	120047167	120047168	2.1051900367761	Aatk
chr11	119895485	119895685	chr11	120047167	120047168	2.32550651045371	Aatk
chr11	119913377	119914185	chr11	120047167	120047168	1.62929680553679	Aatk
chr11	120231535	120231961	chr11	120047167	120047168	1.43992045659153	Aatk
chr16	8417366	8417869	chr16	8513429	8513430	2.88236362268818	Abat
chr16	8513241	8513788	chr16	8513429	8513430	2.27571716622415	Abat
chr16	8523784	8524331	chr16	8513429	8513430	4.46067454859453	Abat
chr16	8529963	8530731	chr16	8513429	8513430	1.38594112161055	Abat
chr16	8540870	8541522	chr16	8513429	8513430	2.23443356106551	Abat
chr16	8579089	8579289	chr16	8513429	8513430	2.11823753376269	Abat
chr4	53159811	53160315	chr4	53159895	53159896	1.67696767943039	Abca1
chr4	53253796	53254133	chr4	53159895	53159896	8.70170138192639	Abca1
chr4	53263994	53264807	chr4	53159895	53159896	2.95264876744368	Abca1
chr11	9048521	9049360	chr11	9191942	9191943	1.7147270955857	Abca13
chr17	24539171	24539416	chr17	24351029	24351030	1.90334592055534	Abca17
chr2	25224269	25225307	chr2	25428703	25428704	1.60231699637859	Abca2
chr2	25546928	25547397	chr2	25428703	25428704	2.33073107215801	Abca2
chr17	24206651	24206962	chr17	24351950	24351951	1.39653226705427	Abca3
chr17	24211807	24212733	chr17	24351950	24351951	3.92748913463056	Abca3
chr17	24220469	24221423	chr17	24351950	24351951	2.29328687271283	Abca3
chr17	24470041	24470890	chr17	24351950	24351951	2.36540520482155	Abca3
chr17	24488214	24489564	chr17	24351950	24351951	1.83228434562533	Abca3
chr11	110111381	110111664	chr11	110337716	110337717	1.76160429691054	Abca5
chr11	110139441	110139715	chr11	110337716	110337717	2.5713371344761	Abca5
chr11	110337272	110338117	chr11	110337716	110337717	1.90111006841722	Abca5
chr11	110463919	110464333	chr11	110337716	110337717	2.10054082977475	Abca5
chr10	79892930	79893282	chr10	79996494	79996495	1.45071498424036	Abca7
chr10	79926828	79927838	chr10	79996494	79996495	1.57787096702989	Abca7
chr10	80063339	80063614	chr10	79996494	79996495	2.21569837260762	Abca7
chr11	109995764	109996169	chr11	109995845	109995846	3.4510867193334	Abca8b
chr11	110188422	110188918	chr11	109995845	109995846	2.11540463695092	Abca8b
chr8	123740450	123740749	chr8	123983122	123983123	3.90166141135787	Abcb10
chr8	123891513	123893225	chr8	123983122	123983123	3.21931775891751	Abcb10
chr5	9100406	9101356	chr5	8893721	8893722	1.3287198722514	Abcb4
chr1	75219069	75219998	chr1	75180392	75180393	3.66023293973352	Abcb6
chr1	75236276	75237255	chr1	75180392	75180393	2.45749833371416	Abcb6
chr1	75263274	75264665	chr1	75180392	75180393	6.89886859534783	Abcb6
chr1	75278338	75278737	chr1	75180392	75180393	2.0591888154289	Abcb6
chr1	75283224	75283775	chr1	75180392	75180393	1.7864507944788	Abcb6
chr1	75338407	75338690	chr1	75180392	75180393	1.41154892240226	Abcb6
chrX	104200022	104200304	chrX	104413856	104413857	1.95670121631505	Abcb7
chr5	24551151	24551450	chr5	24393663	24393664	2.19780356818031	Abcb8
chr5	124049756	124050296	chr5	124095798	124095799	6.2164771866858	Abcb9
chr5	124074978	124075472	chr5	124095798	124095799	1.67788996014839	Abcb9
chr5	124079311	124079521	chr5	124095798	124095799	1.45094241716	Abcb9
chr5	124095262	124096341	chr5	124095798	124095799	6.44616303127017	Abcb9
chr5	124238404	124238785	chr5	124095798	124095799	3.21175560753324	Abcb9
chr5	124249287	124250458	chr5	124095798	124095799	1.58284506625529	Abcb9
chr5	124269619	124270130	chr5	124095798	124095799	1.32346877306953	Abcb9
chr16	14477865	14478153	chr16	14361558	14361559	1.39016172176109	Abcc1
chr17	46253714	46254761	chr17	46328352	46328353	1.975658176675	Abcc10
chr17	46474067	46474267	chr17	46328352	46328353	1.53597239816803	Abcc10
chr17	46555115	46555429	chr17	46328352	46328353	1.85928226340287	Abcc10
chr14	118924849	118925864	chr14	118706219	118706220	1.86733892528199	Abcc4
chr14	118937476	118938328	chr14	118706219	118706220	2.42951847181125	Abcc4
chr16	20498570	20499389	chr16	20426394	20426395	1.63871119155431	Abcc5
chr7	45973143	45973798	chr7	46180033	46180034	1.41102208969308	Abcc8
chr7	46100619	46101137	chr7	46180033	46180034	1.35715146247806	Abcc8
chr7	46113408	46113864	chr7	46180033	46180034	1.63007335809198	Abcc8
chr7	46116681	46116881	chr7	46180033	46180034	1.65345287077776	Abcc8
chr7	46128136	46128686	chr7	46180033	46180034	1.85811677351831	Abcc8
chr7	46141008	46141666	chr7	46180033	46180034	3.98549493744803	Abcc8
chr7	46155667	46156452	chr7	46180033	46180034	13.4695811336142	Abcc8
chr7	46201779	46202271	chr7	46180033	46180034	1.75266832438998	Abcc8
chrX	73864738	73865192	chrX	73716597	73716598	2.44932093169874	Abcd1
chrX	73880381	73881400	chrX	73716597	73716598	2.45956127828939	Abcd1
chr15	91017369	91017806	chr15	91191807	91191808	3.30461183493155	Abcd2
chr15	91017896	91018304	chr15	91191807	91191808	8.68688077352121	Abcd2
chr15	91018649	91019120	chr15	91191807	91191808	5.84609633621905	Abcd2
chr15	91056363	91056612	chr15	91191807	91191808	3.48938681065164	Abcd2
chr15	91064084	91064284	chr15	91191807	91191808	1.3509466243133	Abcd2
chr15	91191481	91192170	chr15	91191807	91191808	3.3121932445984	Abcd2
chr15	91304529	91304954	chr15	91191807	91191808	1.60946224573896	Abcd2
chr15	91373231	91373668	chr15	91191807	91191808	2.63655857202796	Abcd2
chr3	121790652	121790948	chr3	121815215	121815216	4.118209449124	Abcd3
chr3	121953023	121953799	chr3	121815215	121815216	1.48979108652552	Abcd3
chr3	121967668	121968298	chr3	121815215	121815216	1.4338992654506	Abcd3
chr8	79638889	79640424	chr8	79711740	79711741	1.33875092617504	Abce1
chr8	79711347	79712143	chr8	79711740	79711741	2.08373304887304	Abce1
chr8	79734537	79734864	chr8	79711740	79711741	1.5335228901357	Abce1
chr8	79830195	79830580	chr8	79711740	79711741	1.50991210022448	Abce1
chr8	79874083	79874539	chr8	79711740	79711741	1.85040109306917	Abce1
chr8	79929757	79929984	chr8	79711740	79711741	3.43197175003138	Abce1
chr17	35727104	35727602	chr17	35969761	35969762	1.36503622869695	Abcf1
chr17	36083163	36084370	chr17	35969761	35969762	1.32109927931946	Abcf1
chr17	36205974	36206519	chr17	35969761	35969762	1.91690863533898	Abcf1
chr5	24483606	24483862	chr5	24577467	24577468	1.68090511466651	Abcf2
chr5	24530097	24530647	chr5	24577467	24577468	2.35563510252136	Abcf2
chr5	24598685	24599108	chr5	24577467	24577468	1.48133042569756	Abcf2
chr16	20516755	20517391	chr16	20548577	20548578	2.20240736500298	Abcf3
chr16	20672585	20673669	chr16	20548577	20548578	1.8350419930581	Abcf3
chr16	20732479	20734017	chr16	20548577	20548578	2.11510866077251	Abcf3
chr17	30826098	30826468	chr17	31057698	31057699	1.92315038447446	Abcg1
chr17	30882334	30883064	chr17	31057698	31057699	6.59617186068186	Abcg1
chr17	31057439	31058276	chr17	31057698	31057699	1.51592755486391	Abcg1
chr17	31091599	31091888	chr17	31057698	31057699	1.41667348271411	Abcg1
chr17	31187618	31187880	chr17	31057698	31057699	1.37533515238355	Abcg1
chr6	58603738	58604073	chr6	58584523	58584524	1.50519212641168	Abcg2
chr9	44233499	44234616	chr9	44288615	44288616	1.48079493490183	Abcg4
chr9	44379158	44379921	chr9	44288615	44288616	1.57321914412072	Abcg4
chr9	44396838	44397673	chr9	44288615	44288616	1.34497668670983	Abcg4
chr17	84551170	84551741	chr17	84683011	84683012	3.82108551707136	Abcg5
chr17	84596887	84597227	chr17	84683011	84683012	2.72535119180995	Abcg5
chr17	84644419	84644784	chr17	84683011	84683012	7.34175640400301	Abcg5
chr17	84644981	84645197	chr17	84683011	84683012	1.86394080476076	Abcg5
chr17	84753447	84753942	chr17	84683011	84683012	3.35606113677423	Abcg5
chr16	45629825	45630398	chr16	45742955	45742956	1.77093707509	Abhd10
chr5	135008681	135010164	chr5	135009152	135009153	1.79142136983639	Abhd11
chr2	150775290	150775490	chr2	150904741	150904742	1.3028468501467	Abhd12
chr9	106318134	106318729	chr9	106447678	106447679	6.67749586517223	Abhd14a
chr9	106664454	106665145	chr9	106447678	106447679	1.91874727634779	Abhd14a
chr9	106675684	106675992	chr9	106447678	106447679	3.23500657996625	Abhd14a
chr9	106289057	106289393	chr9	106447788	106447789	1.47668471514169	Abhd14b
chr11	77386353	77386841	chr11	77515121	77515122	1.57655299587042	Abhd15
chr17	34850082	34850739	chr17	35089263	35089264	1.66712893859866	Abhd16a
chr17	34894091	34894855	chr17	35089263	35089264	2.44941809734103	Abhd16a
chr17	35262889	35263744	chr17	35089263	35089264	1.45454245114495	Abhd16a
chr10	80356551	80356982	chr10	80590341	80590342	2.15506819369428	Abhd17a
chr10	80387684	80388151	chr10	80590341	80590342	1.51378646001784	Abhd17a
chr10	80398827	80400149	chr10	80590341	80590342	1.65989573781808	Abhd17a
chr10	80475311	80476021	chr10	80590341	80590342	4.48668809083885	Abhd17a
chr10	80481675	80482287	chr10	80590341	80590342	5.52484173888361	Abhd17a
chr10	80509604	80509823	chr10	80590341	80590342	1.79828958931383	Abhd17a
chr10	80513982	80514381	chr10	80590341	80590342	2.73664830442205	Abhd17a
chr10	80548666	80549160	chr10	80590341	80590342	3.20404225574131	Abhd17a
chr10	80835184	80835484	chr10	80590341	80590342	3.12931932021847	Abhd17a
chr10	80835651	80836001	chr10	80590341	80590342	2.39369961626138	Abhd17a
chr7	83914801	83915128	chr7	84151893	84151894	1.55119691520409	Abhd17c
chr7	84001477	84002377	chr7	84151893	84151894	10.2064082968236	Abhd17c
chr7	84272345	84272918	chr7	84151893	84151894	1.32051737365862	Abhd17c
chr7	84304376	84304860	chr7	84151893	84151894	2.57678104725895	Abhd17c
chr7	84350539	84351281	chr7	84151893	84151894	3.56305213028199	Abhd17c
chr7	79148831	79149595	chr7	79273201	79273202	1.94022032079274	Abhd2
chr7	79272868	79273841	chr7	79273201	79273202	1.58807099264061	Abhd2
chr18	10617593	10618451	chr18	10706771	10706772	2.9619560510194	Abhd3
chr14	54259162	54259889	chr14	54254129	54254130	1.47065036422048	Abhd4
chr14	54412955	54413198	chr14	54254129	54254130	1.52540565818957	Abhd4
chr14	54449198	54449768	chr14	54254129	54254130	2.07282228130531	Abhd4
chr14	54463894	54464778	chr14	54254129	54254130	1.30394869113105	Abhd4
chr9	122160130	122160330	chr9	122351608	122351609	3.17876021047335	Abhd5
chr9	122342318	122342865	chr9	122351608	122351609	4.06939664801036	Abhd5
chr9	122396232	122396741	chr9	122351608	122351609	4.09949484400616	Abhd5
chr14	7889228	7889792	chr14	8002902	8002903	6.0140915615345	Abhd6
chr14	7964693	7964922	chr14	8002902	8002903	1.3434923837073	Abhd6
chr8	71507548	71508205	chr8	71463657	71463658	1.79815367408544	Abhd8
chr8	71569622	71571019	chr8	71463657	71463658	2.04321815733682	Abhd8
chr8	71602254	71603452	chr8	71463657	71463658	2.14453093948967	Abhd8
chr8	71685738	71686241	chr8	71463657	71463658	4.72981478081067	Abhd8
chr2	22939742	22939942	chr2	23040241	23040242	1.47053802581357	Abi1
chr2	31899801	31900238	chr2	31688376	31688377	1.36098305733104	Abl1
chr1	156310757	156311161	chr1	156558786	156558787	1.71864612953373	Abl2
chr1	156420778	156421495	chr1	156558786	156558787	2.49649322436998	Abl2
chr1	156470425	156470929	chr1	156558786	156558787	4.91735626688054	Abl2
chr1	156474039	156474670	chr1	156558786	156558787	1.55526341025727	Abl2
chr1	156544088	156544288	chr1	156558786	156558787	1.36751737559201	Abl2
chr1	156718429	156719507	chr1	156558786	156558787	2.47767649322868	Abl2
chr1	156782180	156782406	chr1	156558786	156558787	1.66338035018705	Abl2
chr19	57134752	57135526	chr19	57314919	57314920	2.74480394184425	Ablim1
chr19	57194186	57194442	chr19	57314919	57314920	2.02296840708094	Ablim1
chr19	57197208	57197831	chr19	57314919	57314920	2.70585125141112	Ablim1
chr19	57236654	57237326	chr19	57314919	57314920	3.04133591572028	Ablim1
chr19	57242058	57242504	chr19	57314919	57314920	2.03994247681533	Ablim1
chr19	57298715	57299065	chr19	57314919	57314920	5.15398513915096	Ablim1
chr19	57314412	57315421	chr19	57314919	57314920	3.76695411497628	Ablim1
chr19	57404358	57404949	chr19	57314919	57314920	3.05102720977848	Ablim1
chr19	57418047	57418516	chr19	57314919	57314920	1.69500347890816	Ablim1
chr19	57441733	57442031	chr19	57314919	57314920	3.26271337508035	Ablim1
chr19	57442428	57442905	chr19	57314919	57314920	3.79787502021821	Ablim1
chr19	57526676	57526987	chr19	57314919	57314920	2.54039135020791	Ablim1
chr5	35595948	35596272	chr5	35757880	35757881	1.73760770267698	Ablim2
chr5	35609465	35609990	chr5	35757880	35757881	1.97538157081544	Ablim2
chr5	35670072	35670323	chr5	35757880	35757881	2.59829210847	Ablim2
chr5	35679089	35679643	chr5	35757880	35757881	1.92566671697982	Ablim2
chr5	35695991	35696338	chr5	35757880	35757881	4.7476461479387	Ablim2
chr5	35779638	35780084	chr5	35757880	35757881	6.78440050223682	Ablim2
chr5	35878073	35878385	chr5	35757880	35757881	4.0397360997076	Ablim2
chr5	35928573	35928805	chr5	35757880	35757881	1.67636405987275	Ablim2
chr18	61680883	61681098	chr18	61911852	61911853	4.12997751809064	Ablim3
chr18	61692064	61692910	chr18	61911852	61911853	2.00749660622748	Ablim3
chr18	61825892	61826726	chr18	61911852	61911853	9.57382421384811	Ablim3
chr18	61900870	61901261	chr18	61911852	61911853	1.6657463522451	Ablim3
chr18	61910810	61912106	chr18	61911852	61911853	1.57664364258731	Ablim3
chr18	61974439	61974639	chr18	61911852	61911853	3.01567150754752	Ablim3
chr18	62098126	62098616	chr18	61911852	61911853	6.55545603906038	Ablim3
chr18	62144110	62144341	chr18	61911852	61911853	1.86688963243414	Ablim3
chr11	76467272	76468277	chr11	76622314	76622315	1.39609249062205	Abr
chr11	76507063	76507333	chr11	76622314	76622315	1.35342804434507	Abr
chr11	76577876	76578338	chr11	76622314	76622315	1.50679808279619	Abr
chr11	76846519	76847440	chr11	76622314	76622315	1.43322041648119	Abr
chr15	41665916	41666194	chr15	41869720	41869721	1.9294213797004	Abra
chr10	17861023	17861705	chr10	18023252	18023253	3.23678251956187	Abracl
chr10	17947330	17948553	chr10	18023252	18023253	1.81658247228904	Abracl
chr10	17991613	17992134	chr10	18023252	18023253	8.75092079532754	Abracl
chr10	18021931	18023532	chr10	18023252	18023253	1.44497515737825	Abracl
chr10	18055297	18056588	chr10	18023252	18023253	1.64657949788731	Abracl
chr10	18073315	18073913	chr10	18023252	18023253	2.90922609412984	Abracl
chr10	18080703	18081630	chr10	18023252	18023253	3.19651731087983	Abracl
chr10	18107098	18107352	chr10	18023252	18023253	1.59879975789707	Abracl
chr6	88760051	88760302	chr6	88841935	88841936	1.63923117038507	Abtb1
chr6	88886677	88887022	chr6	88841935	88841936	1.73277394703537	Abtb1
chr6	88919225	88919425	chr6	88841935	88841936	1.68884526544167	Abtb1
chr6	88938305	88938839	chr6	88841935	88841936	3.3844067377022	Abtb1
chr6	88942658	88943197	chr6	88841935	88841936	1.31487522799759	Abtb1
chr6	88980249	88980678	chr6	88841935	88841936	1.42534718539178	Abtb1
chr6	89000541	89000741	chr6	88841935	88841936	2.831233669837	Abtb1
chr6	89003436	89003662	chr6	88841935	88841936	1.46289123741187	Abtb1
chr6	89008660	89009096	chr6	88841935	88841936	3.13272191246005	Abtb1
chr6	89024324	89024726	chr6	88841935	88841936	3.02826506762051	Abtb1
chr2	103610760	103611658	chr2	103566310	103566311	10.2629050648042	Abtb2
chr2	103623088	103623368	chr2	103566310	103566311	11.5212444069173	Abtb2
chr2	103631365	103631587	chr2	103566310	103566311	2.76680981305164	Abtb2
chr2	103637426	103637795	chr2	103566310	103566311	4.06967803307328	Abtb2
chr2	103643565	103644329	chr2	103566310	103566311	2.08926011872182	Abtb2
chr2	103703737	103704793	chr2	103566310	103566311	6.40872842445972	Abtb2
chr9	119382598	119383083	chr9	119339676	119339677	2.23478184582673	Acaa1a
chr9	119444694	119445651	chr9	119339676	119339677	2.31645945024752	Acaa1a
chr18	74529699	74530343	chr18	74779197	74779198	2.44565331346699	Acaa2
chr18	74614418	74614942	chr18	74779197	74779198	4.16071087800005	Acaa2
chr18	74662268	74662587	chr18	74779197	74779198	2.4438607783167	Acaa2
chr18	74688521	74689415	chr18	74779197	74779198	2.93049533660527	Acaa2
chr18	74717933	74718176	chr18	74779197	74779198	3.12087991469143	Acaa2
chr18	74951032	74951370	chr18	74779197	74779198	4.39873557766381	Acaa2
chr18	74955744	74956130	chr18	74779197	74779198	4.38064790011876	Acaa2
chr11	84090775	84091176	chr11	84129672	84129673	2.44170771379409	Acaca
chr5	114072398	114072743	chr5	114146535	114146536	2.41054281230859	Acacb
chr5	121545436	121546376	chr5	121660514	121660515	1.40025611633747	Acad10
chr9	103924744	103925041	chr9	104063377	104063378	1.83269888739676	Acad11
chr9	103941447	103941969	chr9	104063377	104063378	2.02080378069117	Acad11
chr9	26776156	26776687	chr9	26999566	26999567	2.48293893044466	Acad8
chr9	27123074	27123534	chr9	26999566	26999567	1.68312687219931	Acad8
chr1	66862908	66863751	chr1	66863277	66863278	2.20782475801357	Acadl
chr1	66895930	66897103	chr1	66863277	66863278	1.37445050589315	Acadl
chr1	66941175	66941465	chr1	66863277	66863278	1.47366189677515	Acadl
chr1	66990535	66990929	chr1	66863277	66863278	3.10136764487318	Acadl
chr3	153784205	153784648	chr3	153944632	153944633	1.73931004439202	Acadm
chr3	153847489	153847689	chr3	153944632	153944633	3.06798143371376	Acadm
chr3	153944069	153945072	chr3	153944632	153944633	5.40826796764678	Acadm
chr3	153996947	153997201	chr3	153944632	153944633	2.74354272841832	Acadm
chr3	154013306	154013781	chr3	153944632	153944633	4.114250464605	Acadm
chr3	154068054	154068384	chr3	153944632	153944633	5.25328827858128	Acadm
chr3	154068617	154068817	chr3	153944632	153944633	3.98111170789984	Acadm
chr5	115119070	115119536	chr5	115119346	115119347	3.69227945124655	Acads
chr5	115134756	115135259	chr5	115119346	115119347	2.12557385564752	Acads
chr5	115187198	115187690	chr5	115119346	115119347	2.73577315074893	Acads
chr5	115284894	115285094	chr5	115119346	115119347	2.38743446682609	Acads
chr5	115300281	115301509	chr5	115119346	115119347	2.50658718470037	Acads
chr5	115340732	115341602	chr5	115119346	115119347	1.76109849950246	Acads
chr7	131397360	131397600	chr7	131410601	131410602	2.48934248353017	Acadsb
chr7	131465195	131465760	chr7	131410601	131410602	6.27898687240828	Acadsb
chr7	131542436	131542841	chr7	131410601	131410602	2.2425617235675	Acadsb
chr7	131598008	131598877	chr7	131410601	131410602	7.81104555434456	Acadsb
chr7	131602235	131602624	chr7	131410601	131410602	1.65993600276663	Acadsb
chr11	69795369	69795768	chr11	70015411	70015412	2.66272982909497	Acadvl
chr11	69880679	69880956	chr11	70015411	70015412	3.53452747492372	Acadvl
chr11	69881150	69881749	chr11	70015411	70015412	1.62291147202576	Acadvl
chr11	69934372	69934651	chr11	70015411	70015412	4.18817588447095	Acadvl
chr11	69948760	69949341	chr11	70015411	70015412	2.18792453697618	Acadvl
chr16	31342528	31343126	chr16	31201238	31201239	1.97957096226514	Acap2
chr16	31364618	31364818	chr16	31201238	31201239	2.42113066882648	Acap2
chr4	155653136	155654046	chr4	155891822	155891823	2.57453036352964	Acap3
chr9	53384066	53385108	chr9	53610382	53610383	1.81459592620675	Acat1
chr9	53822580	53822823	chr9	53610382	53610383	1.61049515744926	Acat1
chr1	180483327	180484471	chr1	180726043	180726044	2.95219797609422	Acbd3
chr1	180547698	180548424	chr1	180726043	180726044	9.9795296202937	Acbd3
chr1	180568701	180569534	chr1	180726043	180726044	2.0770854775727	Acbd3
chr1	180892079	180892530	chr1	180726043	180726044	2.05302648247498	Acbd3
chr1	180919176	180919456	chr1	180726043	180726044	2.55430142284729	Acbd3
chr11	102880691	102881630	chr11	103101682	103101683	1.3251914782022	Acbd4
chr11	102980579	102980908	chr11	103101682	103101683	1.56796508797368	Acbd4
chr11	103016886	103017543	chr11	103101682	103101683	1.31646435978799	Acbd4
chr2	23155802	23157066	chr2	23068168	23068169	2.12602975137269	Acbd5
chr1	155442680	155443565	chr1	155558120	155558121	12.2928473862629	Acbd6
chr1	155488680	155489088	chr1	155558120	155558121	5.55130557582753	Acbd6
chr1	155711444	155711866	chr1	155558120	155558121	1.99757941047236	Acbd6
chr1	155712147	155713141	chr1	155558120	155558121	15.6117153062704	Acbd6
chr1	155784874	155785346	chr1	155558120	155558121	2.3372439158226	Acbd6
chr2	3183758	3184003	chr2	3336168	3336169	2.53588420873091	Acbd7
chr2	3229267	3229524	chr2	3336168	3336169	1.60262605217242	Acbd7
chr2	3305890	3306261	chr2	3336168	3336169	1.74068152204774	Acbd7
chr2	3578531	3578731	chr2	3336168	3336169	1.30192634137524	Acbd7
chr2	93729760	93729986	chr2	93849943	93849944	1.55958213759073	Accs
chr2	93891551	93892468	chr2	93849943	93849944	2.98178027186878	Accs
chr2	93907886	93908287	chr2	93849943	93849944	4.06407343065613	Accs
chr8	105758035	105759029	chr8	105701095	105701096	1.37004727069311	Acd
chr11	106020182	106020983	chr11	105967945	105967946	1.95203834713362	Ace
chr4	87020814	87021014	chr4	86874396	86874397	1.45797007412953	Acer2
chr4	87087004	87087751	chr4	86874396	86874397	2.16484387566376	Acer2
chr7	98308891	98309894	chr7	98321208	98321209	2.89317325292982	Acer3
chr7	98360226	98361795	chr7	98321208	98321209	2.39318687988012	Acer3
chr5	137286765	137287995	chr5	137287519	137287520	7.39643054970292	Ache
chr14	54893721	54894533	chr14	54686931	54686932	1.4450012607887	Acin1
chr1	90205303	90205786	chr1	90203980	90203981	2.53321374791342	Ackr3
chr1	90253331	90253768	chr1	90203980	90203981	7.34025018655174	Ackr3
chr1	90311950	90312473	chr1	90203980	90203981	11.1622243598837	Ackr3
chr1	90313952	90314468	chr1	90203980	90203981	7.91771162785874	Ackr3
chr1	90374452	90375356	chr1	90203980	90203981	21.0946948961419	Ackr3
chr1	90417965	90418212	chr1	90203980	90203981	1.31086838752982	Ackr3
chr11	100327532	100327760	chr11	100528000	100528001	2.60977302916449	Acly
chr11	100332793	100333657	chr11	100528000	100528001	1.5301850920326	Acly
chr11	100414140	100415168	chr11	100528000	100528001	2.05332733849086	Acly
chr15	81729779	81730492	chr15	81872309	81872310	1.41415647373797	Aco2
chr15	81871776	81872807	chr15	81872309	81872310	1.59645955017885	Aco2
chr15	81936640	81938216	chr15	81872309	81872310	1.77018686942905	Aco2
chr12	83770378	83771309	chr12	84009502	84009503	2.8265447898497	Acot1
chr12	83998496	83998696	chr12	84009502	84009503	2.87953778080951	Acot1
chr12	84009404	84010018	chr12	84009502	84009503	13.8034212493892	Acot1
chr12	84011535	84012025	chr12	84009502	84009503	5.30561440991287	Acot1
chr12	84114350	84114879	chr12	84009502	84009503	1.45060444729892	Acot1
chr12	84181209	84181663	chr12	84009502	84009503	6.05702239821949	Acot1
chr4	106617262	106617667	chr4	106804998	106804999	3.76945079483079	Acot11
chr4	106700178	106700483	chr4	106804998	106804999	1.4113107258368	Acot11
chr4	106700889	106701492	chr4	106804998	106804999	1.75705780221054	Acot11
chr4	106747238	106747470	chr4	106804998	106804999	1.59550797456213	Acot11
chr4	106749797	106750354	chr4	106804998	106804999	2.23662000977733	Acot11
chr4	106865529	106866272	chr4	106804998	106804999	2.73056209846982	Acot11
chr4	107012295	107012831	chr4	106804998	106804999	1.95492445325421	Acot11
chr13	24940926	24941309	chr13	24831517	24831518	1.96599380470366	Acot13
chr12	83998496	83998696	chr12	83987861	83987862	1.50492492209346	Acot2
chr12	84011535	84012025	chr12	83987861	83987862	4.63723169621625	Acot2
chr12	84114350	84114879	chr12	83987861	83987862	1.70792702402414	Acot2
chr12	84161852	84162249	chr12	83987861	83987862	2.56573388664675	Acot2
chr12	84181209	84181663	chr12	83987861	83987862	3.33784804383191	Acot2
chr12	84220692	84220983	chr12	83987861	83987862	1.98125304906491	Acot2
chr12	83813809	83814009	chr12	84038379	84038380	1.82582771561622	Acot4
chr12	84053452	84054213	chr12	84038379	84038380	1.4905318873457	Acot4
chr12	84150126	84150353	chr12	84038379	84038380	1.73595453621185	Acot4
chr12	83972248	83972549	chr12	84100654	84100655	2.13857067401567	Acot6
chr12	83998496	83998696	chr12	84100654	84100655	1.73712075414255	Acot6
chr12	84009404	84010018	chr12	84100654	84100655	1.49443328638805	Acot6
chr12	84038271	84039112	chr12	84100654	84100655	1.31194856133467	Acot6
chr12	84100802	84101592	chr12	84100654	84100655	1.49884756802434	Acot6
chr12	84181209	84181663	chr12	84100654	84100655	5.86082002988024	Acot6
chr12	84222565	84223115	chr12	84100654	84100655	1.88389688379307	Acot6
chr12	84278107	84278349	chr12	84100654	84100655	6.16818439206778	Acot6
chr12	84316640	84317660	chr12	84100654	84100655	1.87435306942923	Acot6
chr4	152107804	152108728	chr4	152178134	152178135	2.43694647256764	Acot7
chr4	152119492	152120085	chr4	152178134	152178135	3.27915780714049	Acot7
chr4	152177811	152179117	chr4	152178134	152178135	2.29372594351676	Acot7
chr4	152273806	152274516	chr4	152178134	152178135	2.91707170788863	Acot7
chr4	152274944	152275353	chr4	152178134	152178135	1.78852003412219	Acot7
chr4	152283184	152283763	chr4	152178134	152178135	1.33103753865053	Acot7
chr4	152315534	152316254	chr4	152178134	152178135	4.30178810458654	Acot7
chr4	152325674	152326198	chr4	152178134	152178135	1.76910926982278	Acot7
chr4	152412551	152413072	chr4	152178134	152178135	7.6878570554065	Acot7
chr4	152418637	152419133	chr4	152178134	152178135	1.46742644107963	Acot7
chr2	165043018	165043842	chr2	164804882	164804883	3.23293079728048	Acot8
chr11	116219067	116219335	chr11	116199045	116199046	1.8109965708946	Acox1
chr11	116281345	116281670	chr11	116199045	116199046	1.40973343756924	Acox1
chr11	116319121	116319543	chr11	116199045	116199046	1.44502107389905	Acox1
chr11	116335315	116336145	chr11	116199045	116199046	1.80349956703834	Acox1
chr11	116368151	116368624	chr11	116199045	116199046	1.47569685302253	Acox1
chr5	35337684	35338200	chr5	35583040	35583041	1.63964575440698	Acox3
chr5	35348996	35349349	chr5	35583040	35583041	1.8329497087165	Acox3
chr5	35621395	35621610	chr5	35583040	35583041	1.51215552108073	Acox3
chr2	128020633	128021119	chr2	127838876	127838877	3.85443874948487	Acoxl
chr2	128047513	128047781	chr2	127838876	127838877	1.76521437890121	Acoxl
chr12	30851182	30851382	chr12	30911612	30911613	1.30998213114544	Acp1
chr3	96978160	96979014	chr3	97158777	97158778	2.48498331709899	Acp6
chr3	97100669	97101390	chr3	97158777	97158778	3.04101428152813	Acp6
chr6	125028524	125028724	chr6	125049689	125049690	1.89107127465842	Acrbp
chr6	125071785	125072290	chr6	125049689	125049690	2.50811514855892	Acrbp
chr9	54534048	54534474	chr9	54661870	54661871	3.62847641097677	Acsbg1
chr9	54559966	54560658	chr9	54661870	54661871	2.63818099742313	Acsbg1
chr9	54676521	54677175	chr9	54661870	54661871	1.61785088568913	Acsbg1
chr9	54745938	54746215	chr9	54661870	54661871	3.779975842369	Acsbg1
chr9	54787877	54788431	chr9	54661870	54661871	1.73395326793724	Acsbg1
chr11	94474313	94474729	chr11	94601871	94601872	1.72073897907361	Acsf2
chr11	94537542	94537742	chr11	94601871	94601872	1.91239509772124	Acsf2
chr11	94591754	94592119	chr11	94601871	94601872	1.51087442998791	Acsf2
chr11	94653766	94654358	chr11	94601871	94601872	1.83823862669418	Acsf2
chr11	94676920	94677867	chr11	94601871	94601872	1.41144154924488	Acsf2
chr11	94786304	94786512	chr11	94601871	94601872	1.43080888551443	Acsf2
chr8	122745338	122746330	chr8	122775505	122775506	4.54363758342051	Acsf3
chr8	122803906	122804719	chr8	122775505	122775506	1.6893305838912	Acsf3
chr8	122811799	122812433	chr8	122775505	122775506	11.5450729254041	Acsf3
chr8	122987646	122987851	chr8	122775505	122775506	1.61736813304946	Acsf3
chr8	123004071	123004501	chr8	122775505	122775506	3.02508554235366	Acsf3
chr8	46252452	46252737	chr8	46471041	46471042	3.69976021011475	Acsl1
chr8	46470583	46472045	chr8	46471041	46471042	2.3290530729678	Acsl1
chr1	78725956	78726334	chr1	78657825	78657826	1.76263496188924	Acsl3
chr1	78767161	78767600	chr1	78657825	78657826	6.44591786827112	Acsl3
chr1	78863740	78863946	chr1	78657825	78657826	1.58444161961662	Acsl3
chr1	78899034	78899234	chr1	78657825	78657826	1.39486036239849	Acsl3
chrX	142193644	142193961	chrX	142390535	142390536	9.59009078621008	Acsl4
chrX	142398718	142399192	chrX	142390535	142390536	6.5674343390171	Acsl4
chr19	55099156	55100211	chr19	55253369	55253370	2.77822046878744	Acsl5
chr19	55198396	55198863	chr19	55253369	55253370	2.1042574057517	Acsl5
chr19	55407829	55408029	chr19	55253369	55253370	2.17981628729438	Acsl5
chr19	55448808	55449055	chr19	55253369	55253370	1.47865694640641	Acsl5
chr19	55456563	55457011	chr19	55253369	55253370	3.25417258475326	Acsl5
chr19	55496462	55496860	chr19	55253369	55253370	3.19705209221537	Acsl5
chr11	54069048	54069576	chr11	54303798	54303799	1.46680176465404	Acsl6
chr11	54413059	54413541	chr11	54303798	54303799	1.41747384051954	Acsl6
chr2	150451070	150451908	chr2	150668500	150668501	3.53967735279759	Acss1
chr2	150643846	150644528	chr2	150668500	150668501	4.76628962562425	Acss1
chr2	150667371	150668548	chr2	150668500	150668501	1.69946249314876	Acss1
chr2	150735684	150736668	chr2	150668500	150668501	3.84071273867516	Acss1
chr2	150770776	150771338	chr2	150668500	150668501	2.36045790049379	Acss1
chr2	155629251	155629829	chr2	155517948	155517949	1.65154233493687	Acss2
chr8	123682326	123682849	chr8	123894736	123894737	1.53678000648484	Acta1
chr8	123859165	123860294	chr8	123894736	123894737	1.31170620147088	Acta1
chr8	123884842	123885640	chr8	123894736	123894737	6.84569910108358	Acta1
chr8	123891513	123893225	chr8	123894736	123894737	7.63991223041712	Acta1
chr8	123982432	123983476	chr8	123894736	123894737	1.86665745627325	Acta1
chr5	142784967	142785167	chr5	142906754	142906755	1.31432474693953	Actb
chr5	142804423	142804937	chr5	142906754	142906755	4.88232137944743	Actb
chr5	142817731	142818336	chr5	142906754	142906755	1.32624768605955	Actb
chr5	142960257	142961242	chr5	142906754	142906755	2.04844000784167	Actb
chr5	143125627	143126195	chr5	142906754	142906755	1.99130415299481	Actb
chr2	114260431	114261024	chr2	114053548	114053549	2.03656789863851	Actc1
chr11	120294885	120295235	chr11	120348542	120348543	1.54166546933004	Actg1
chr11	120310914	120311417	chr11	120348542	120348543	1.80751535082787	Actg1
chr11	120349966	120350825	chr11	120348542	120348543	2.35315675313334	Actg1
chr11	120366598	120366967	chr11	120348542	120348543	2.20729861268035	Actg1
chr11	120484227	120485178	chr11	120348542	120348543	1.94441786177724	Actg1
chr11	120581100	120582412	chr11	120348542	120348543	2.20602631689082	Actg1
chr3	32940331	32940577	chr3	32706298	32706299	1.83333774545706	Actl6a
chr5	137553291	137554007	chr5	137553517	137553518	1.33816153334333	Actl6b
chr5	137648463	137648729	chr5	137553517	137553518	2.845620529494	Actl6b
chr12	80062180	80063135	chr12	80260371	80260372	2.92037864058824	Actn1
chr13	12180084	12180284	chr13	12340760	12340761	2.07665203843975	Actn2
chr13	12210515	12210720	chr13	12340760	12340761	1.81540377233451	Actn2
chr13	12503589	12503945	chr13	12340760	12340761	1.58090934438802	Actn2
chr13	12565606	12566577	chr13	12340760	12340761	2.80917623533748	Actn2
chr12	71114033	71114449	chr12	70937857	70937858	2.33879544475011	Actr10
chr19	46317157	46317766	chr19	46395735	46395736	2.18056148310649	Actr1a
chr19	46319197	46319530	chr19	46395735	46395736	3.24632724485037	Actr1a
chr19	46348600	46349571	chr19	46395735	46395736	2.19240279354056	Actr1a
chr19	46481128	46481570	chr19	46395735	46395736	1.89808587957389	Actr1a
chr1	36770978	36771483	chr1	36714422	36714423	2.61759037904996	Actr1b
chr11	19919902	19920862	chr11	20112913	20112914	1.81176235364603	Actr2
chr11	19935892	19936622	chr11	20112913	20112914	3.55336709510102	Actr2
chr11	20026726	20026926	chr11	20112913	20112914	2.7377209146382	Actr2
chr1	125372892	125373424	chr1	125435727	125435728	2.19872815629847	Actr3
chr1	125683413	125683896	chr1	125435727	125435728	4.1959190251597	Actr3
chr5	25886794	25887269	chr5	25759997	25759998	2.63598289264156	Actr3b
chr5	26006931	26007754	chr5	25759997	25759998	2.28331467876521	Actr3b
chr2	158534182	158534684	chr2	158624888	158624889	2.1260125901208	Actr5
chr2	158561041	158561986	chr2	158624888	158624889	2.75389333445433	Actr5
chr2	158595212	158596014	chr2	158624888	158624889	2.43762299262127	Actr5
chr2	158606835	158607194	chr2	158624888	158624889	2.56863664013852	Actr5
chr2	158610804	158611280	chr2	158624888	158624889	1.87797880641866	Actr5
chr2	158613794	158613999	chr2	158624888	158624889	3.41079223262287	Actr5
chr14	29940360	29941351	chr14	29978337	29978338	1.50313638476006	Actr8
chr14	29978300	29979272	chr14	29978337	29978338	1.39105653426467	Actr8
chr14	30116098	30116411	chr14	29978337	29978338	1.79973457312054	Actr8
chr2	58532316	58532807	chr2	58567157	58567158	2.23642677402084	Acvr1
chr2	58566561	58567130	chr2	58567157	58567158	1.35337418107155	Acvr1
chr15	100936270	100936591	chr15	101174067	101174068	2.73648687398557	Acvr1b
chr15	101092814	101093828	chr15	101174067	101174068	2.32132130728822	Acvr1b
chr15	101231669	101232108	chr15	101174067	101174068	2.10773343625067	Acvr1b
chr15	101253959	101254889	chr15	101174067	101174068	1.62412953533736	Acvr1b
chr15	101266304	101267171	chr15	101174067	101174068	2.44006340260173	Acvr1b
chr15	101327344	101327771	chr15	101174067	101174068	1.31781184580529	Acvr1b
chr2	58174329	58175120	chr2	58357895	58357896	7.21700862818187	Acvr1c
chr2	58199359	58199907	chr2	58357895	58357896	3.01636803878664	Acvr1c
chr2	58282758	58282958	chr2	58357895	58357896	1.62218775268093	Acvr1c
chr2	58532316	58532807	chr2	58357895	58357896	2.0274037114913	Acvr1c
chr2	48609245	48609797	chr2	48814109	48814110	2.57599697344319	Acvr2a
chr2	48620882	48621120	chr2	48814109	48814110	2.05157714755786	Acvr2a
chr2	48909119	48909341	chr2	48814109	48814110	1.41751775342597	Acvr2a
chr9	119178409	119178721	chr9	119402444	119402445	1.35064647489725	Acvr2b
chr9	119272144	119272344	chr9	119402444	119402445	1.41660322571186	Acvr2b
chr9	119444694	119445651	chr9	119402444	119402445	1.61970964252614	Acvr2b
chr9	106438245	106438974	chr9	106438319	106438320	1.55272508859171	Acy1
chr12	85201619	85201918	chr12	85288438	85288439	3.89510234027564	Acyp1
chr11	30471511	30472273	chr11	30649587	30649588	2.21595057068268	Acyp2
chr11	30649098	30649756	chr11	30649587	30649588	2.5991689125328	Acyp2
chr11	30745155	30745355	chr11	30649587	30649588	2.24762909187434	Acyp2
chr11	30754864	30755701	chr11	30649587	30649588	1.55875896255118	Acyp2
chr11	30885169	30886036	chr11	30649587	30649588	2.53162695874999	Acyp2
chr2	163823319	163823712	chr2	163750239	163750240	1.50968143330917	Ada
chr2	163968580	163969066	chr2	163750239	163750240	1.82436743060921	Ada
chr2	121008149	121008918	chr2	121140428	121140429	1.44088594874615	Adal
chr9	70503173	70504121	chr9	70678997	70678998	1.55224408529845	Adam10
chr9	70729656	70730014	chr9	70678997	70678998	2.34072586130923	Adam10
chr9	70885576	70886157	chr9	70678997	70678998	14.2350953932387	Adam10
chr9	70922374	70922736	chr9	70678997	70678998	1.52635087778932	Adam10
chr11	102656670	102657514	chr11	102761439	102761440	1.54337565486549	Adam11
chr11	102864343	102864753	chr11	102761439	102761440	1.70863689940822	Adam11
chr11	102953081	102953583	chr11	102761439	102761440	3.2266285382743	Adam11
chr7	134295595	134295795	chr7	134232146	134232147	1.74993066594614	Adam12
chr7	134378528	134378728	chr7	134232146	134232147	3.61268404871027	Adam12
chr3	89164718	89165483	chr3	89349996	89349997	1.53914615785242	Adam15
chr3	89245925	89246770	chr3	89349996	89349997	2.22312489490631	Adam15
chr3	89299713	89300141	chr3	89349996	89349997	3.38202204835346	Adam15
chr3	89321632	89321963	chr3	89349996	89349997	1.7884441874358	Adam15
chr3	89322617	89323276	chr3	89349996	89349997	2.36360034340067	Adam15
chr3	89331193	89331466	chr3	89349996	89349997	1.39489176010342	Adam15
chr3	89349837	89350755	chr3	89349996	89349997	1.37320416637742	Adam15
chr3	89458895	89459845	chr3	89349996	89349997	2.96471551750944	Adam15
chr3	89547025	89547567	chr3	89349996	89349997	6.30816506948639	Adam15
chr3	89570377	89571178	chr3	89349996	89349997	24.0855897845211	Adam15
chr12	21134232	21134855	chr12	21373632	21373633	2.25044451175922	Adam17
chr12	21204924	21205397	chr12	21373632	21373633	1.82948027166991	Adam17
chr11	46039504	46039991	chr11	46055992	46055993	22.3696570787873	Adam19
chr11	46202511	46202876	chr11	46055992	46055993	2.64159759721121	Adam19
chr11	46218669	46219051	chr11	46055992	46055993	2.50182481254191	Adam19
chr11	46235260	46236082	chr11	46055992	46055993	3.04413323162118	Adam19
chr5	121477648	121478178	chr5	121521695	121521696	1.62744965433185	Adam1a
chr5	8145667	8145933	chr5	8368160	8368161	2.11933558620292	Adam22
chr1	63203955	63204944	chr1	63445891	63445892	4.36920297817448	Adam23
chr1	63247185	63247652	chr1	63445891	63445892	3.9180062643841	Adam23
chr1	63252574	63252775	chr1	63445891	63445892	2.235139139013	Adam23
chr1	63256106	63256670	chr1	63445891	63445892	5.07661225601299	Adam23
chr1	63266312	63266512	chr1	63445891	63445892	2.41598953526784	Adam23
chr1	63272931	63273916	chr1	63445891	63445892	1.60250954117071	Adam23
chr1	63367993	63368519	chr1	63445891	63445892	1.52204804051054	Adam23
chr1	63387904	63388548	chr1	63445891	63445892	14.4048950887313	Adam23
chr1	63418313	63418851	chr1	63445891	63445892	7.61780039560634	Adam23
chr1	63422598	63423330	chr1	63445891	63445892	16.8395269248683	Adam23
chr1	63490258	63490638	chr1	63445891	63445892	10.1100250091083	Adam23
chr1	63533707	63534142	chr1	63445891	63445892	2.01568031161653	Adam23
chr1	63534389	63534807	chr1	63445891	63445892	2.72409114613254	Adam23
chr1	63556569	63557035	chr1	63445891	63445892	16.3850652360814	Adam23
chr1	63578927	63579629	chr1	63445891	63445892	3.03216316815457	Adam23
chr1	63614502	63614702	chr1	63445891	63445892	2.14573512499245	Adam23
chr1	63640216	63640417	chr1	63445891	63445892	3.7593251000866	Adam23
chr1	63678084	63678459	chr1	63445891	63445892	12.8518048700303	Adam23
chr14	68434746	68435542	chr14	68655842	68655843	3.10827640688608	Adam28
chr14	68494146	68494560	chr14	68655842	68655843	1.52242199080341	Adam28
chr8	24577053	24577512	chr8	24824369	24824370	2.2605786884217	Adam5
chr14	68693590	68693959	chr14	68533689	68533690	2.06266153621257	Adam7
chr7	139781999	139782334	chr7	139992562	139992563	1.41228572871836	Adam8
chr7	139871072	139871828	chr7	139992562	139992563	3.85925891122256	Adam8
chr8	25016592	25017645	chr8	25016922	25016923	1.43264692631034	Adam9
chr8	25029513	25030295	chr8	25016922	25016923	1.49232650539671	Adam9
chr8	25144982	25145374	chr8	25016922	25016923	2.10538323524797	Adam9
chr8	25189242	25189442	chr8	25016922	25016923	1.33828267939102	Adam9
chr8	25200766	25202082	chr8	25016922	25016923	1.88216585766371	Adam9
chr8	25240520	25241276	chr8	25016922	25016923	1.815028820538	Adam9
chr16	85637254	85637615	chr16	85803113	85803114	5.07152003464754	Adamts1
chr16	85803010	85803483	chr16	85803113	85803114	3.05230365712872	Adamts1
chr16	85889895	85890214	chr16	85803113	85803114	5.51901584925972	Adamts1
chr17	33394329	33395098	chr17	33524204	33524205	1.31305946282927	Adamts10
chr17	33450432	33451062	chr17	33524204	33524205	2.5261070209125	Adamts10
chr17	33524069	33524819	chr17	33524204	33524205	2.54437515900085	Adamts10
chr15	10922863	10923120	chr15	11064790	11064791	1.72528530865455	Adamts12
chr15	11054042	11054838	chr15	11064790	11064791	4.37406048552948	Adamts12
chr15	11101098	11101652	chr15	11064790	11064791	1.85470158188811	Adamts12
chr15	11132951	11133723	chr15	11064790	11064791	6.28185990706405	Adamts12
chr15	11160791	11161253	chr15	11064790	11064791	1.92477428607845	Adamts12
chr2	27143699	27144069	chr2	26973416	26973417	2.72192533769357	Adamts13
chr2	27183926	27184265	chr2	26973416	26973417	1.69009140826266	Adamts13
chr9	30839288	30839667	chr9	30922452	30922453	8.39017766958635	Adamts15
chr9	31029921	31031322	chr9	30922452	30922453	1.80371773764617	Adamts15
chr9	31156727	31157175	chr9	30922452	30922453	7.86620836671718	Adamts15
chr13	70623687	70624088	chr13	70841811	70841812	1.55753986627217	Adamts16
chr13	70650284	70650484	chr13	70841811	70841812	1.66984709781584	Adamts16
chr13	70656518	70656744	chr13	70841811	70841812	2.68569999539228	Adamts16
chr13	70736299	70736572	chr13	70841811	70841812	2.22130165744062	Adamts16
chr13	70780074	70780467	chr13	70841811	70841812	1.58047871724972	Adamts16
chr13	70840390	70840652	chr13	70841811	70841812	1.60627841156568	Adamts16
chr13	70841528	70842043	chr13	70841811	70841812	1.51242293303031	Adamts16
chr13	71068680	71069367	chr13	70841811	70841812	1.30891020817305	Adamts16
chr7	66641103	66641602	chr7	66839735	66839736	1.73814646558112	Adamts17
chr7	66689472	66690545	chr7	66839735	66839736	1.75237197915191	Adamts17
chr7	66721306	66721794	chr7	66839735	66839736	2.63648855266484	Adamts17
chr7	66771313	66771610	chr7	66839735	66839736	3.39034199942404	Adamts17
chr7	66786624	66787136	chr7	66839735	66839736	3.29892205390188	Adamts17
chr7	66839560	66840912	chr7	66839735	66839736	1.44582091284827	Adamts17
chr7	66966862	66967691	chr7	66839735	66839736	3.45850799192942	Adamts17
chr8	113634962	113636040	chr8	113848615	113848616	1.53899374953897	Adamts18
chr8	113705111	113705717	chr8	113848615	113848616	3.79856504458274	Adamts18
chr8	113848056	113849103	chr8	113848615	113848616	1.94185640529392	Adamts18
chr18	59035924	59036124	chr18	58836764	58836765	1.6633809662027	Adamts19
chr11	50601699	50602456	chr11	50602084	50602085	3.02690697310268	Adamts2
chr15	94370721	94370996	chr15	94465418	94465419	1.57546694618313	Adamts20
chr5	89770997	89771221	chr5	89883334	89883335	2.60741299388004	Adamts3
chr5	90047044	90047273	chr5	89883334	89883335	2.50518713570068	Adamts3
chr1	171195874	171196585	chr1	171250421	171250422	1.86096650590013	Adamts4
chr1	171221033	171221261	chr1	171250421	171250422	1.51939580244518	Adamts4
chr1	171262791	171263774	chr1	171250421	171250422	5.47242536382667	Adamts4
chr1	171366133	171366449	chr1	171250421	171250422	1.72733803226026	Adamts4
chr16	85801385	85801880	chr16	85901125	85901126	1.34977467222059	Adamts5
chr16	85900825	85901696	chr16	85901125	85901126	2.73861468627668	Adamts5
chr16	85999788	86000240	chr16	85901125	85901126	9.50933281817083	Adamts5
chr16	86006661	86007120	chr16	85901125	85901126	5.70534622298292	Adamts5
chr16	86010115	86010315	chr16	85901125	85901126	2.49856004962801	Adamts5
chr9	90100986	90101247	chr9	90163069	90163070	1.67506917999433	Adamts7
chr9	31029921	31031322	chr9	30942562	30942563	1.68208286858016	Adamts8
chr9	31156727	31157175	chr9	30942562	30942563	3.40172088680145	Adamts8
chr6	92794879	92795563	chr6	92943492	92943493	1.8106471090212	Adamts9
chr6	93066784	93066984	chr6	92943492	92943493	3.10300269660152	Adamts9
chr4	85842350	85842550	chr4	86053915	86053916	2.52730903040604	Adamtsl1
chr4	86069546	86069837	chr4	86053915	86053916	3.06920579261873	Adamtsl1
chr4	86242045	86242377	chr4	86053915	86053916	2.39168698360728	Adamtsl1
chr2	26933170	26934106	chr2	27079379	27079380	2.6424376781709	Adamtsl2
chr2	26964309	26964946	chr2	27079379	27079380	1.57398161609514	Adamtsl2
chr2	27079181	27080165	chr2	27079379	27079380	2.64096472532453	Adamtsl2
chr2	27126286	27126511	chr2	27079379	27079380	1.94405123333322	Adamtsl2
chr2	27247379	27247586	chr2	27079379	27079380	1.37117825114417	Adamtsl2
chr2	27256477	27256677	chr2	27079379	27079380	4.01178902389329	Adamtsl2
chr2	27310988	27311347	chr2	27079379	27079380	1.75024924255669	Adamtsl2
chr7	82393961	82394883	chr7	82335694	82335695	2.27644447707014	Adamtsl3
chr7	82396016	82396242	chr7	82335694	82335695	2.2224851906149	Adamtsl3
chr7	82404686	82405072	chr7	82335694	82335695	4.21114647715415	Adamtsl3
chr7	82500440	82500744	chr7	82335694	82335695	3.69360838049898	Adamtsl3
chr5	139129181	139130259	chr5	139325622	139325623	4.08478493573797	Adap1
chr5	139251997	139253057	chr5	139325622	139325623	1.68672232242015	Adap1
chr5	139324242	139324489	chr5	139325622	139325623	1.40800385416581	Adap1
chr5	139324921	139326012	chr5	139325622	139325623	6.35522581455747	Adap1
chr5	139345053	139345632	chr5	139325622	139325623	1.73598245789253	Adap1
chr5	139372124	139372683	chr5	139325622	139325623	1.60206738552148	Adap1
chr3	89872378	89872835	chr3	89715022	89715023	2.4188192229394	Adar
chr10	77258852	77259811	chr10	77418270	77418271	1.58590848203477	Adarb1
chr10	77308676	77309232	chr10	77418270	77418271	3.19521245420091	Adarb1
chr10	77622075	77622736	chr10	77418270	77418271	2.1596891047795	Adarb1
chr13	8202806	8203311	chr13	8202866	8202867	2.00166341325439	Adarb2
chr13	8333572	8334254	chr13	8202866	8202867	6.24217878797526	Adarb2
chr8	111779138	111779358	chr8	111992302	111992303	2.52201891207077	Adat1
chr8	111978150	111978662	chr8	111992302	111992303	2.54934249242871	Adat1
chr10	13337121	13337659	chr10	13552894	13552895	5.84920014695426	Adat2
chr12	88423412	88423841	chr12	88360554	88360555	1.61170556220757	Adck1
chr6	39344091	39344544	chr6	39573873	39573874	1.7386655852683	Adck2
chr15	76344714	76344930	chr15	76576358	76576359	1.30911040244022	Adck5
chr11	6953796	6954113	chr11	7063489	7063490	1.87283819556253	Adcy1
chr11	7102092	7103817	chr11	7063489	7063490	1.35952818356154	Adcy1
chr11	7116856	7117192	chr11	7063489	7063490	1.92436309099452	Adcy1
chr11	7119869	7120086	chr11	7063489	7063490	2.62205645913164	Adcy1
chr11	7193084	7193573	chr11	7063489	7063490	2.19716936299217	Adcy1
chr16	34926786	34926986	chr16	35154877	35154878	1.46705758087911	Adcy5
chr16	35072603	35072803	chr16	35154877	35154878	2.67339607531496	Adcy5
chr16	35154932	35156108	chr16	35154877	35154878	1.41249865870548	Adcy5
chr16	35205902	35206195	chr16	35154877	35154878	2.18615002715102	Adcy5
chr16	35252955	35253514	chr16	35154877	35154878	1.87117121427536	Adcy5
chr16	35378332	35378569	chr16	35154877	35154878	4.00822437285426	Adcy5
chr8	88488259	88488519	chr8	88272403	88272404	1.31769874502667	Adcy7
chr15	64921028	64922386	chr15	64922296	64922297	5.87173747887549	Adcy8
chr15	65023915	65024259	chr15	64922296	64922297	5.92268512684209	Adcy8
chr16	4213858	4214665	chr16	4420498	4420499	3.46434370187895	Adcy9
chr16	4318327	4318558	chr16	4420498	4420499	1.76445818806801	Adcy9
chr16	4419370	4420942	chr16	4420498	4420499	1.60565741808	Adcy9
chr16	4463686	4464144	chr16	4420498	4420499	1.92074109697296	Adcy9
chr16	4541644	4542390	chr16	4420498	4420499	2.45095528121355	Adcy9
chr16	4639903	4640484	chr16	4420498	4420499	2.81304295629548	Adcy9
chr6	55336305	55336527	chr6	55451978	55451979	2.58745455149151	Adcyap1r1
chr6	55379736	55380221	chr6	55451978	55451979	3.40749171198434	Adcyap1r1
chr6	55396419	55397156	chr6	55451978	55451979	6.1397017319075	Adcyap1r1
chr6	55407620	55408137	chr6	55451978	55451979	2.88819840663737	Adcyap1r1
chr6	55414595	55414907	chr6	55451978	55451979	1.95891411052825	Adcyap1r1
chr6	55435770	55436196	chr6	55451978	55451979	1.77127842276925	Adcyap1r1
chr6	55444460	55444770	chr6	55451978	55451979	2.64431170212795	Adcyap1r1
chr6	55539285	55539704	chr6	55451978	55451979	2.15049616477978	Adcyap1r1
chr6	55617988	55618463	chr6	55451978	55451979	1.3018774337574	Adcyap1r1
chr6	86058568	86058912	chr6	86078084	86078085	1.37308316041887	Add2
chr6	86087810	86088269	chr6	86078084	86078085	13.9640247413965	Add2
chr6	86258659	86258992	chr6	86078084	86078085	5.02556496335548	Add2
chr19	53015191	53015648	chr19	53140445	53140446	2.85733877629524	Add3
chr19	53022098	53022392	chr19	53140445	53140446	4.37527094619797	Add3
chr19	53055744	53056035	chr19	53140445	53140446	3.77007808398764	Add3
chr19	53142156	53143252	chr19	53140445	53140446	1.96477784937901	Add3
chr19	53265160	53265521	chr19	53140445	53140446	2.5373306372379	Add3
chr10	10472291	10472766	chr10	10472326	10472327	7.63112546469881	Adgb
chr10	10557788	10558614	chr10	10472326	10472327	5.201749649441	Adgb
chr10	10602744	10602983	chr10	10472326	10472327	2.46664542328209	Adgb
chr3	138515746	138516119	chr3	138443093	138443094	1.54642192758154	Adh5
chr3	138526949	138527613	chr3	138443093	138443094	2.41017566364749	Adh5
chr3	138008295	138008525	chr3	138217823	138217824	2.77512335407694	Adh7
chr3	138130597	138131310	chr3	138217823	138217824	1.44892341433626	Adh7
chr3	138221345	138221662	chr3	138217823	138217824	2.90045063523891	Adh7
chr3	138277659	138277859	chr3	138217823	138217824	1.4424803487739	Adh7
chr3	138448409	138448933	chr3	138217823	138217824	3.1445333033834	Adh7
chr1	9564259	9565016	chr1	9547948	9547949	11.3714380550743	Adhfe1
chr1	9578643	9579043	chr1	9547948	9547949	3.39143863326827	Adhfe1
chr1	9584143	9584431	chr1	9547948	9547949	2.25238526875609	Adhfe1
chr1	9608069	9608338	chr1	9547948	9547949	2.20289480917481	Adhfe1
chr1	9630061	9630468	chr1	9547948	9547949	2.51738725522666	Adhfe1
chr1	9700158	9701111	chr1	9547948	9547949	1.74070642189664	Adhfe1
chr12	28460910	28461505	chr12	28675231	28675232	3.05557821274109	Adi1
chr12	28602440	28602640	chr12	28675231	28675232	2.91323011383237	Adi1
chr12	28791193	28791393	chr12	28675231	28675232	1.36776234907733	Adi1
chr12	28865816	28866214	chr12	28675231	28675232	1.38360827959474	Adi1
chr12	28874932	28875258	chr12	28675231	28675232	2.75986125299927	Adi1
chr1	134226217	134226784	chr1	134415378	134415379	1.57759470688103	Adipor1
chr1	134343821	134345146	chr1	134415378	134415379	2.21716302335166	Adipor1
chr6	119237592	119238219	chr6	119417704	119417705	7.05017887284819	Adipor2
chr6	119318625	119319229	chr6	119417704	119417705	2.36825025280494	Adipor2
chr6	119329299	119329787	chr6	119417704	119417705	3.1336446559776	Adipor2
chr6	119590834	119591310	chr6	119417704	119417705	3.69629199407913	Adipor2
chr7	110593159	110593533	chr7	110627661	110627662	1.46907465761275	Adm
chr2	168343762	168344228	chr2	168207112	168207113	2.89326334605405	Adnp
chr2	168425795	168426030	chr2	168207112	168207113	1.6586289967235	Adnp
chr18	79952092	79952522	chr18	80151482	80151483	1.79920280027508	Adnp2
chr18	80390826	80391026	chr18	80151482	80151483	1.97552710939934	Adnp2
chr10	67458877	67459524	chr10	67548955	67548956	1.86139809110347	Ado
chr10	67766223	67766621	chr10	67548955	67548956	1.44159385736144	Ado
chr1	134096478	134096734	chr1	134235431	134235432	2.59380541084204	Adora1
chr1	134142354	134143017	chr1	134235431	134235432	7.66679312282799	Adora1
chr1	134270256	134270522	chr1	134235431	134235432	1.70736458356628	Adora1
chr1	134455138	134456027	chr1	134235431	134235432	1.47227411144767	Adora1
chr11	62076691	62077455	chr11	62248984	62248985	1.37509209458331	Adora2b
chr11	62458381	62458937	chr11	62248984	62248985	2.83077862171475	Adora2b
chr11	62495661	62495861	chr11	62248984	62248985	1.35779764000059	Adora2b
chr9	59189405	59189869	chr9	59291572	59291573	1.88143442677277	Adpgk
chr16	38237161	38237361	chr16	38452689	38452690	1.38454274859852	Adprh
chr16	38452463	38453429	chr16	38452689	38452690	1.87190529818467	Adprh
chr16	38562450	38563345	chr16	38452689	38452690	3.2340931106655	Adprh
chr4	126248515	126248946	chr4	126321703	126321704	1.94936013813017	Adprhl2
chr4	126277971	126278346	chr4	126321703	126321704	1.97442614977299	Adprhl2
chr11	67237548	67237907	chr11	67052594	67052595	1.47417774178118	Adprm
chr14	66390986	66391376	chr14	66635251	66635252	1.40313408862882	Adra1a
chr14	66473100	66473614	chr14	66635251	66635252	3.86358088775445	Adra1a
chr14	66494628	66495209	chr14	66635251	66635252	1.98172136159855	Adra1a
chr14	66500179	66500393	chr14	66635251	66635252	1.44013875223213	Adra1a
chr14	66522281	66523044	chr14	66635251	66635252	2.42149608768508	Adra1a
chr14	66561266	66561921	chr14	66635251	66635252	12.4663225289767	Adra1a
chr14	66635362	66635562	chr14	66635251	66635252	1.70409404110277	Adra1a
chr14	66636258	66637181	chr14	66635251	66635252	5.46544711189939	Adra1a
chr14	66705783	66706232	chr14	66635251	66635252	2.12189350097004	Adra1a
chr14	66725281	66725614	chr14	66635251	66635252	6.27916608692923	Adra1a
chr14	66771683	66772126	chr14	66635251	66635252	1.78523968364417	Adra1a
chr14	66785027	66785442	chr14	66635251	66635252	2.06451095715981	Adra1a
chr11	43836160	43836896	chr11	43901210	43901211	2.1232775387244	Adra1b
chr11	43853198	43853443	chr11	43901210	43901211	2.22910588295366	Adra1b
chr11	44081390	44081704	chr11	43901210	43901211	2.71313098488379	Adra1b
chr11	44127160	44127731	chr11	43901210	43901211	1.95690404182511	Adra1b
chr19	53802206	53802699	chr19	54045182	54045183	2.46192197114516	Adra2a
chr19	53830529	53830987	chr19	54045182	54045183	2.71834030378105	Adra2a
chr19	53858177	53858578	chr19	54045182	54045183	1.92242624825304	Adra2a
chr19	54087718	54088002	chr19	54045182	54045183	1.46959366439323	Adra2a
chr19	54107260	54107814	chr19	54045182	54045183	3.23538378583667	Adra2a
chr19	54120504	54121144	chr19	54045182	54045183	19.4786004426136	Adra2a
chr19	54259074	54259274	chr19	54045182	54045183	1.36104524152587	Adra2a
chr5	35056732	35057840	chr5	35278566	35278567	4.00497471510647	Adra2c
chr5	35166165	35166510	chr5	35278566	35278567	4.80981528738682	Adra2c
chr5	35208973	35209260	chr5	35278566	35278567	2.33258127918249	Adra2c
chr5	35278798	35279897	chr5	35278566	35278567	2.54890891904242	Adra2c
chr5	35280625	35281245	chr5	35278566	35278567	2.02689901952196	Adra2c
chr5	35447939	35448643	chr5	35278566	35278567	3.34491190915527	Adra2c
chr5	35496405	35496844	chr5	35278566	35278567	1.81956404923618	Adra2c
chr19	56476613	56477049	chr19	56722372	56722373	1.31361552326315	Adrb1
chr19	56652360	56652661	chr19	56722372	56722373	1.75881281519895	Adrb1
chr19	56760857	56761133	chr19	56722372	56722373	2.38575879950878	Adrb1
chr18	62098126	62098616	chr18	62179959	62179960	1.53587325237535	Adrb2
chr18	62183950	62184498	chr18	62179959	62179960	7.56788592901804	Adrb2
chr18	62229788	62230342	chr18	62179959	62179960	2.46504834904427	Adrb2
chr18	62254092	62254432	chr18	62179959	62179960	3.12131840905169	Adrb2
chr2	180024614	180025677	chr2	180171485	180171486	1.32210168876981	Adrm1
chr2	180103212	180104831	chr2	180171485	180171486	1.53940581829926	Adrm1
chr15	80930199	80930404	chr15	80948490	80948491	1.68329971047634	Adsl
chr15	81133003	81133203	chr15	80948490	80948491	2.05344711859743	Adsl
chr12	112396051	112396509	chr12	112620045	112620046	4.39685975746255	Adssl1
chr12	112411746	112412326	chr12	112620045	112620046	1.36299912286454	Adssl1
chr12	112433281	112433966	chr12	112620045	112620046	3.24936313194938	Adssl1
chr12	112494661	112495281	chr12	112620045	112620046	5.99583537439464	Adssl1
chr12	112507457	112507789	chr12	112620045	112620046	1.79775873883586	Adssl1
chr12	112510852	112511784	chr12	112620045	112620046	1.48124641451256	Adssl1
chr12	112560477	112560682	chr12	112620045	112620046	1.57953048951112	Adssl1
chr12	112653206	112653699	chr12	112620045	112620046	1.48160258904353	Adssl1
chr12	112674514	112674749	chr12	112620045	112620046	1.67390626004979	Adssl1
chr12	112693428	112694405	chr12	112620045	112620046	2.46804677722749	Adssl1
chr12	112722176	112723267	chr12	112620045	112620046	1.77526713721793	Adssl1
chr11	5892723	5893334	chr11	5861947	5861948	1.40411997495442	Aebp1
chr11	5955320	5956128	chr11	5861947	5861948	1.57772822775986	Aebp1
chr11	6065447	6066276	chr11	5861947	5861948	2.00405264119728	Aebp1
chr7	78766264	78766770	chr7	78895854	78895855	1.50921035301317	Aen
chr7	78768214	78768750	chr7	78895854	78895855	1.66188144604493	Aen
chr7	78846833	78847652	chr7	78895854	78895855	1.95778157348639	Aen
chr7	78890705	78891094	chr7	78895854	78895855	1.83014520843503	Aen
chr7	78895513	78896286	chr7	78895854	78895855	1.39145072575208	Aen
chr10	81430501	81430978	chr10	81559494	81559495	1.50229339097867	Aes
chr5	35975733	35976180	chr5	35893319	35893320	1.98274070998207	Afap1
chr5	36142018	36142245	chr5	35893319	35893320	1.5567156829001	Afap1
chr18	61557106	61557321	chr18	61786702	61786703	1.47175300833187	Afap1l1
chr19	56977832	56978160	chr19	57008228	57008229	2.89386391502346	Afap1l2
chr19	57008260	57008849	chr19	57008228	57008229	1.96532100853583	Afap1l2
chr19	57017443	57017931	chr19	57008228	57008229	2.52622169558573	Afap1l2
chr19	57077902	57078573	chr19	57008228	57008229	2.04831707362366	Afap1l2
chr19	57152432	57152715	chr19	57008228	57008229	2.46424026448567	Afap1l2
chr5	103579893	103580441	chr5	103692374	103692375	2.26250192095529	Aff1
chr5	103603337	103603909	chr5	103692374	103692375	1.74906876157659	Aff1
chr5	103629256	103629721	chr5	103692374	103692375	2.67866134264705	Aff1
chr5	103692235	103692801	chr5	103692374	103692375	3.29492061667245	Aff1
chr5	103753699	103754572	chr5	103692374	103692375	7.26016102649537	Aff1
chr5	103760409	103760990	chr5	103692374	103692375	2.58203547687072	Aff1
chr5	103773308	103773638	chr5	103692374	103692375	3.53214310457821	Aff1
chr5	103778520	103779038	chr5	103692374	103692375	1.90445751014788	Aff1
chr5	103817927	103818189	chr5	103692374	103692375	3.14656402280519	Aff1
chr5	103855035	103855268	chr5	103692374	103692375	1.74533618959235	Aff1
chr5	103927516	103927901	chr5	103692374	103692375	2.05551059273515	Aff1
chr5	103937131	103937620	chr5	103692374	103692375	1.76508117587489	Aff1
chrX	69368497	69368925	chrX	69360294	69360295	4.14073909684746	Aff2
chrX	69426280	69426524	chrX	69360294	69360295	4.82007533080574	Aff2
chr1	38417409	38417743	chr1	38664955	38664956	2.46963257979622	Aff3
chr1	38439924	38440315	chr1	38664955	38664956	6.9691800036516	Aff3
chr1	38446360	38446609	chr1	38664955	38664956	1.5366215278598	Aff3
chr1	38496871	38497515	chr1	38664955	38664956	3.34774765139034	Aff3
chr1	38503578	38503871	chr1	38664955	38664956	1.49091581468158	Aff3
chr1	38511497	38511845	chr1	38664955	38664956	2.62786658965834	Aff3
chr1	38537236	38537485	chr1	38664955	38664956	1.87900563376095	Aff3
chr1	38545545	38546106	chr1	38664955	38664956	6.69232744855205	Aff3
chr1	38550770	38551073	chr1	38664955	38664956	4.11603559378648	Aff3
chr1	38565383	38565699	chr1	38664955	38664956	1.80146318918003	Aff3
chr1	38574343	38574771	chr1	38664955	38664956	3.18600688157919	Aff3
chr1	38595021	38595225	chr1	38664955	38664956	1.56660865360691	Aff3
chr1	38612899	38613472	chr1	38664955	38664956	2.01247235819344	Aff3
chr1	38661486	38661958	chr1	38664955	38664956	13.1771515104284	Aff3
chr1	38671002	38671713	chr1	38664955	38664956	3.56430373946121	Aff3
chr1	38730583	38730853	chr1	38664955	38664956	3.03607537577555	Aff3
chr1	38767706	38768302	chr1	38664955	38664956	2.43696762775015	Aff3
chr1	38787472	38787996	chr1	38664955	38664956	1.75127681582782	Aff3
chr1	38790070	38790478	chr1	38664955	38664956	2.36381721539133	Aff3
chr1	38847962	38848553	chr1	38664955	38664956	2.95390730363712	Aff3
chr1	38910970	38911383	chr1	38664955	38664956	14.2189625752505	Aff3
chr11	53137218	53137890	chr11	53350833	53350834	10.4993425308259	Aff4
chr11	53145188	53145650	chr11	53350833	53350834	2.02359250090727	Aff4
chr11	117889217	117889529	chr11	117825924	117825925	1.62485497892795	Afmid
chr11	117889844	117890418	chr11	117825924	117825925	4.401899885481	Afmid
chr11	20631405	20632740	chr11	20741589	20741590	1.4413766012346	Aftph
chr8	53597198	53597742	chr8	53511702	53511703	1.39175464686408	Aga
chr8	53600207	53600882	chr8	53511702	53511703	2.42446290476067	Aga
chr8	53607306	53607506	chr8	53511702	53511703	1.89676826991711	Aga
chr1	89339911	89340266	chr1	89454806	89454807	7.04236484883553	Agap1
chr1	89353165	89353531	chr1	89454806	89454807	1.64958529242548	Agap1
chr1	89599834	89600146	chr1	89454806	89454807	1.3546696094139	Agap1
chr1	89652826	89653248	chr1	89454806	89454807	1.75104498715659	Agap1
chr6	34638823	34639216	chr6	34780432	34780433	2.90529309412209	Agbl3
chr6	35002310	35002638	chr6	34780432	34780433	1.95255581491748	Agbl3
chr4	110168426	110169023	chr4	110397661	110397662	2.59813178350919	Agbl4
chr4	110240214	110240439	chr4	110397661	110397662	1.70641918061969	Agbl4
chr4	110287598	110288139	chr4	110397661	110397662	1.69270174890752	Agbl4
chr4	110290229	110290429	chr4	110397661	110397662	1.33120272831652	Agbl4
chr4	110457778	110458187	chr4	110397661	110397662	2.92793532073946	Agbl4
chr4	110507693	110508610	chr4	110397661	110397662	4.89974766422835	Agbl4
chr4	110566373	110566677	chr4	110397661	110397662	2.9918378315095	Agbl4
chr4	110584049	110584663	chr4	110397661	110397662	2.11895372495708	Agbl4
chr1	82815995	82816518	chr1	82839483	82839484	2.36981665515788	Agfg1
chr5	137574538	137575107	chr5	137684726	137684727	1.54208486168635	Agfg2
chr5	137760178	137760580	chr5	137684726	137684727	1.39964381739088	Agfg2
chr13	95186209	95186852	chr13	95375352	95375353	2.95435302710679	Aggf1
chr13	95425719	95426108	chr13	95375352	95375353	7.40875054687202	Aggf1
chr6	40303572	40303875	chr6	40325478	40325479	1.47275512981208	Agk
chr3	116891911	116892507	chr3	116808166	116808167	1.38049043905751	Agl
chr4	126248515	126248946	chr4	126468583	126468584	2.17469785413751	Ago1
chr4	126600546	126600923	chr4	126468583	126468584	1.88779645276803	Ago1
chr4	126619906	126620667	chr4	126468583	126468584	2.6561622205094	Ago1
chr4	126627367	126627638	chr4	126468583	126468584	2.28289150195458	Ago1
chr4	126648232	126648856	chr4	126468583	126468584	2.52629338694337	Ago1
chr15	73019945	73020243	chr15	73184840	73184841	2.54336139938193	Ago2
chr15	73054413	73055218	chr15	73184840	73184841	4.80387694508963	Ago2
chr15	73095384	73095619	chr15	73184840	73184841	2.57839212667655	Ago2
chr15	73110027	73110266	chr15	73184840	73184841	1.62676636618229	Ago2
chr15	73137008	73137844	chr15	73184840	73184841	2.85567947331669	Ago2
chr15	73140272	73140840	chr15	73184840	73184841	3.08655515980869	Ago2
chr15	73152261	73152787	chr15	73184840	73184841	1.72452574139451	Ago2
chr15	73184174	73184526	chr15	73184840	73184841	1.37726724489219	Ago2
chr15	73264132	73264389	chr15	73184840	73184841	2.3131311211753	Ago2
chr4	126237800	126238018	chr4	126429556	126429557	2.06851965675502	Ago3
chr4	126619906	126620667	chr4	126429556	126429557	2.01746158503885	Ago3
chr4	126600546	126600923	chr4	126533472	126533473	1.31497725306429	Ago4
chr4	126619906	126620667	chr4	126533472	126533473	1.68154128621782	Ago4
chr4	126648232	126648856	chr4	126533472	126533473	8.69259190442052	Ago4
chr17	34398054	34399693	chr17	34604262	34604263	1.38247739718065	Agpat1
chr17	34411169	34411686	chr17	34604262	34604263	2.73917567263773	Agpat1
chr17	34439890	34440352	chr17	34604262	34604263	1.34258424650708	Agpat1
chr17	34778156	34778502	chr17	34604262	34604263	3.11610057776288	Agpat1
chr17	34836577	34837421	chr17	34604262	34604263	2.00202114066287	Agpat1
chr2	26533069	26533909	chr2	26604417	26604418	1.94369124784548	Agpat2
chr10	78412422	78413447	chr10	78352489	78352490	2.61200434157324	Agpat3
chr10	78470791	78471516	chr10	78352489	78352490	2.36990523695441	Agpat3
chr17	11980556	11981485	chr17	12118704	12118705	1.41748493983861	Agpat4
chr17	12104072	12104805	chr17	12118704	12118705	3.78826747114186	Agpat4
chr17	12187817	12188459	chr17	12118704	12118705	5.67935738734317	Agpat4
chr17	12195833	12196033	chr17	12118704	12118705	1.57852814358886	Agpat4
chr17	12230081	12230668	chr17	12118704	12118705	2.26316350476156	Agpat4
chr17	12327898	12328647	chr17	12118704	12118705	1.34870790947719	Agpat4
chr2	75589712	75589978	chr2	75832177	75832178	1.7328975293862	Agps
chr2	75761918	75762231	chr2	75832177	75832178	1.81546695284749	Agps
chr2	75988448	75989397	chr2	75832177	75832178	2.33009949242703	Agps
chr2	76003171	76003371	chr2	75832177	75832178	1.52371206884888	Agps
chr2	76038747	76039091	chr2	75832177	75832178	2.56718834251785	Agps
chr13	59387961	59388589	chr13	59585227	59585228	1.55817406860872	Agtpbp1
chr13	59416950	59417318	chr13	59585227	59585228	2.08063462572142	Agtpbp1
chr13	59439844	59440097	chr13	59585227	59585228	1.40436398629665	Agtpbp1
chr13	59643151	59643351	chr13	59585227	59585228	1.31482131861076	Agtpbp1
chr13	59769502	59770717	chr13	59585227	59585228	1.82351241737189	Agtpbp1
chr4	147868107	147869072	chr4	148088031	148088032	3.29111175861877	Agtrap
chr4	147936478	147937015	chr4	148088031	148088032	3.01184478412742	Agtrap
chr4	148008474	148008850	chr4	148088031	148088032	1.64180980289836	Agtrap
chr4	148121525	148121918	chr4	148088031	148088032	1.97395669603728	Agtrap
chr4	148122442	148122802	chr4	148088031	148088032	4.62396977083643	Agtrap
chr4	148166816	148167334	chr4	148088031	148088032	2.09876597933634	Agtrap
chr4	148229720	148229920	chr4	148088031	148088032	3.60656815594101	Agtrap
chr4	148306439	148307339	chr4	148088031	148088032	3.70335582512967	Agtrap
chr2	155018957	155020258	chr2	155074497	155074498	2.06979668658469	Ahcy
chr3	107491739	107491966	chr3	107696560	107696561	3.0649305147575	Ahcyl1
chr3	107496307	107496852	chr3	107696560	107696561	3.37680399332397	Ahcyl1
chr3	107807541	107808075	chr3	107696560	107696561	1.45509744276579	Ahcyl1
chr3	107849060	107849585	chr3	107696560	107696561	5.370525298038	Ahcyl1
chr3	107887867	107888301	chr3	107696560	107696561	3.73670925497701	Ahcyl1
chr3	107931637	107932227	chr3	107696560	107696561	10.5228293901377	Ahcyl1
chr3	107943566	107944181	chr3	107696560	107696561	1.68115589858885	Ahcyl1
chr6	30009637	30010047	chr6	29768011	29768012	5.29213427101072	Ahcyl2
chr10	20876343	20876543	chr10	20952547	20952548	1.44033508459101	Ahi1
chr10	20907223	20907521	chr10	20952547	20952548	2.15148047609951	Ahi1
chr10	20920998	20921568	chr10	20952547	20952548	3.36509598223795	Ahi1
chr10	20954292	20954684	chr10	20952547	20952548	3.52736834836455	Ahi1
chr10	21048829	21049029	chr10	20952547	20952548	1.32473005677389	Ahi1
chr10	21089236	21089436	chr10	20952547	20952548	2.38460445557787	Ahi1
chr19	8837301	8838015	chr19	8989284	8989285	1.35337165050507	Ahnak
chr19	8992891	8993280	chr19	8989284	8989285	3.83989432096691	Ahnak
chr19	9026638	9027024	chr19	8989284	8989285	4.53946436604318	Ahnak
chr19	9071501	9071939	chr19	8989284	8989285	6.43151760289646	Ahnak
chr19	9143796	9144232	chr19	8989284	8989285	8.43519588246492	Ahnak
chr12	112588463	112589360	chr12	112802657	112802658	1.41626582045217	Ahnak2
chr12	113041547	113042141	chr12	112802657	112802658	1.69896093600366	Ahnak2
chr12	35608595	35608923	chr12	35535038	35535039	2.80076793000817	Ahr
chr12	35632521	35633045	chr12	35535038	35535039	1.91150228171534	Ahr
chr13	74259772	74260706	chr13	74292331	74292332	1.94311084463845	Ahrr
chr12	87026323	87027140	chr12	87266746	87266747	3.28956010088344	Ahsa1
chr12	87418982	87419480	chr12	87266746	87266747	3.858866196177	Ahsa1
chr12	87472022	87472669	chr12	87266746	87266747	1.43440879676029	Ahsa1
chr6	122491715	122492128	chr6	122553801	122553802	2.08533464207083	Aicda
chr6	122522766	122523119	chr6	122553801	122553802	1.56049850300222	Aicda
chr6	122742013	122742213	chr6	122553801	122553802	1.35627242990941	Aicda
chr1	183079100	183079503	chr1	183296590	183296591	1.65420092856414	Aida
chr1	183095705	183095905	chr1	183296590	183296591	1.39053576794138	Aida
chr1	183149787	183150221	chr1	183296590	183296591	2.29739166339203	Aida
chr1	183350084	183350325	chr1	183296590	183296591	1.58966541302914	Aida
chr1	183430052	183430595	chr1	183296590	183296591	3.93518526414064	Aida
chr17	35021375	35021879	chr17	35176068	35176069	1.87188039072614	Aif1
chr17	35065637	35066019	chr17	35176068	35176069	1.48824368203151	Aif1
chr17	35126332	35126676	chr17	35176068	35176069	1.71651981068816	Aif1
chr2	31963013	31963391	chr2	31950139	31950140	10.8756913488318	Aif1l
chr2	32166722	32167016	chr2	31950139	31950140	1.47489227652037	Aif1l
chr2	32167507	32168330	chr2	31950139	31950140	2.15840622697755	Aif1l
chr2	32192092	32192317	chr2	31950139	31950140	2.29361905985822	Aif1l
chrX	48386131	48386396	chrX	48513563	48513564	2.26030883562925	Aifm1
chrX	48532414	48532702	chrX	48513563	48513564	1.46158767754254	Aifm1
chrX	48594123	48594926	chrX	48513563	48513564	1.60615391997837	Aifm1
chr10	61625551	61626294	chr10	61715263	61715264	2.37331961247951	Aifm2
chr10	61749000	61749210	chr10	61715263	61715264	2.63621276821158	Aifm2
chr10	61753061	61753375	chr10	61715263	61715264	5.53621296423251	Aifm2
chr10	61764880	61765232	chr10	61715263	61715264	2.6863912786345	Aifm2
chr10	61812977	61813770	chr10	61715263	61715264	3.40454596242858	Aifm2
chr10	61949691	61950284	chr10	61715263	61715264	7.61213637398947	Aifm2
chr16	17268132	17268440	chr16	17489611	17489612	2.0945769892683	Aifm3
chr16	17277900	17278425	chr16	17489611	17489612	2.21673000668516	Aifm3
chr16	17474365	17474565	chr16	17489611	17489612	2.43568127640838	Aifm3
chr10	13726942	13727257	chr10	13868980	13868981	3.2996050246515	Aig1
chr10	13761786	13762098	chr10	13868980	13868981	1.57671022609282	Aig1
chr10	13862048	13862267	chr10	13868980	13868981	2.33154957149427	Aig1
chr10	13868469	13869372	chr10	13868980	13868981	1.60265838598724	Aig1
chr10	13905823	13906023	chr10	13868980	13868981	1.30772909197654	Aig1
chr10	13964866	13965278	chr10	13868980	13868981	1.3501662030411	Aig1
chr10	13976479	13976679	chr10	13868980	13868981	1.94370386915156	Aig1
chr10	14011202	14011492	chr10	13868980	13868981	3.63073929993442	Aig1
chr10	14017750	14018465	chr10	13868980	13868981	4.8125044220999	Aig1
chr10	14057095	14057366	chr10	13868980	13868981	2.19153512139243	Aig1
chr3	132666935	132667250	chr3	132683879	132683880	6.59897473415929	Aimp1
chr3	132766409	132766811	chr3	132683879	132683880	1.51347035267927	Aimp1
chr3	132863377	132863625	chr3	132683879	132683880	2.62783161833407	Aimp1
chr3	132930043	132930399	chr3	132683879	132683880	1.79162662871848	Aimp1
chr5	143731977	143732956	chr5	143909847	143909848	1.45140304209523	Aimp2
chr5	143758162	143758621	chr5	143909847	143909848	1.48724841410648	Aimp2
chr11	71864159	71864501	chr11	72037509	72037510	1.97957451080619	Aipl1
chr11	72008455	72008680	chr11	72037509	72037510	1.38674184863418	Aipl1
chr11	72029198	72029566	chr11	72037509	72037510	1.83221941402195	Aipl1
chr11	72050725	72051986	chr11	72037509	72037510	1.62364573128745	Aipl1
chr4	153236829	153237363	chr4	153482811	153482812	2.17103601200717	Ajap1
chr4	153320967	153321519	chr4	153482811	153482812	3.57770218855942	Ajap1
chr4	153430285	153430640	chr4	153482811	153482812	2.88340710453327	Ajap1
chr4	153436055	153436520	chr4	153482811	153482812	2.42557225873459	Ajap1
chr4	153439218	153439418	chr4	153482811	153482812	2.46692440844832	Ajap1
chr4	153524604	153525165	chr4	153482811	153482812	8.55759817088547	Ajap1
chr4	153546083	153546288	chr4	153482811	153482812	13.7926021547877	Ajap1
chr4	153546676	153546876	chr4	153482811	153482812	4.40798270545907	Ajap1
chr14	54553854	54554919	chr14	54577661	54577662	2.66264248044198	Ajuba
chr14	54569225	54569544	chr14	54577661	54577662	1.66017962292451	Ajuba
chr14	54578314	54578514	chr14	54577661	54577662	1.56693981656561	Ajuba
chr14	54583905	54584124	chr14	54577661	54577662	2.99748355580685	Ajuba
chr2	32451113	32452477	chr2	32621758	32621759	1.99679078915802	Ak1
chr2	32575623	32576298	chr2	32621758	32621759	1.6545040514059	Ak1
chr2	32581497	32582012	chr2	32621758	32621759	1.46230352207802	Ak1
chr2	32625380	32626256	chr2	32621758	32621759	1.85510785040799	Ak1
chr2	32741928	32742803	chr2	32621758	32621759	1.55748373798828	Ak1
chr4	128877342	128878005	chr4	128991958	128991959	2.14387985520115	Ak2
chr4	128962304	128962891	chr4	128991958	128991959	1.37418769491594	Ak2
chr4	128998423	128998908	chr4	128991958	128991959	3.1316248551775	Ak2
chr19	28827757	28828303	chr19	29047961	29047962	4.84500629927734	Ak3
chr19	29024415	29025119	chr19	29047961	29047962	7.74023021307974	Ak3
chr19	29067398	29067598	chr19	29047961	29047962	2.49718959487872	Ak3
chr4	101264602	101265604	chr4	101419277	101419278	1.88823821897054	Ak4
chr4	101367177	101367795	chr4	101419277	101419278	2.19572139410116	Ak4
chr4	101419092	101419691	chr4	101419277	101419278	2.26035284819832	Ak4
chr3	152484098	152484631	chr3	152668140	152668141	1.80521088639783	Ak5
chr3	152758813	152759228	chr3	152668140	152668141	5.18955222550912	Ak5
chr3	152883854	152884262	chr3	152668140	152668141	1.72866487384288	Ak5
chr13	100516869	100517300	chr13	100650979	100650980	2.30455221264901	Ak6
chr13	100616451	100617282	chr13	100650979	100650980	2.50128333078663	Ak6
chr13	100730496	100731340	chr13	100650979	100650980	1.94722914034582	Ak6
chr13	100832967	100833900	chr13	100650979	100650980	1.43128779264041	Ak6
chr2	28466380	28466644	chr2	28700164	28700165	1.33145701276428	Ak8
chr2	28865776	28866425	chr2	28700164	28700165	2.77054698909312	Ak8
chr11	61682501	61682701	chr11	61930252	61930253	2.01298793334746	Akap10
chr14	78290030	78290230	chr14	78536860	78536861	1.79129673852763	Akap11
chr14	78630252	78630452	chr14	78536860	78536861	1.62100942776824	Akap11
chr10	4107770	4108128	chr10	4266329	4266330	1.75917349691872	Akap12
chr10	4247736	4247992	chr10	4266329	4266330	2.28000632031006	Akap12
chr10	4265793	4267404	chr10	4266329	4266330	4.12501221765156	Akap12
chr10	4290810	4291174	chr10	4266329	4266330	3.29734287228657	Akap12
chr10	4327410	4327828	chr10	4266329	4266330	2.33592744330396	Akap12
chr10	4372012	4372463	chr10	4266329	4266330	2.70024846341446	Akap12
chr10	4386595	4387691	chr10	4266329	4266330	1.31464848774693	Akap12
chr7	75220963	75221360	chr7	75455534	75455535	1.3547428515891	Akap13
chr7	75292112	75292571	chr7	75455534	75455535	2.59783589608519	Akap13
chr7	75328917	75329565	chr7	75455534	75455535	2.58020752407078	Akap13
chr6	126766841	126767051	chr6	126853098	126853099	1.42381801267504	Akap3
chr6	126767861	126768634	chr6	126853098	126853099	3.11269994641087	Akap3
chr6	126792228	126792428	chr6	126853098	126853099	1.36167373493403	Akap3
chr6	126921471	126921947	chr6	126853098	126853099	2.61239061022878	Akap3
chr12	76302798	76303084	chr12	76324891	76324892	1.8704059318097	Akap5
chr12	76428043	76428331	chr12	76324891	76324892	1.66594784027703	Akap5
chr12	52478840	52479130	chr12	52699383	52699384	1.42678945778015	Akap6
chr12	52675342	52675542	chr12	52699383	52699384	1.37780522218497	Akap6
chr12	52769540	52770426	chr12	52699383	52699384	8.9303802789267	Akap6
chr12	52774060	52774314	chr12	52699383	52699384	2.14475912058783	Akap6
chr12	52789228	52789579	chr12	52699383	52699384	1.81617397462289	Akap6
chr12	52813345	52813754	chr12	52699383	52699384	1.87378416514448	Akap6
chr12	52818211	52819012	chr12	52699383	52699384	2.54332899542881	Akap6
chr12	52934480	52934781	chr12	52699383	52699384	2.59710442696361	Akap6
chr10	25068440	25068776	chr10	25307870	25307871	3.81037806968166	Akap7
chr10	25082787	25083406	chr10	25307870	25307871	8.50349718695805	Akap7
chr10	25089943	25090498	chr10	25307870	25307871	2.20760097760745	Akap7
chr10	25098773	25099177	chr10	25307870	25307871	7.85439180683182	Akap7
chr10	25200810	25201037	chr10	25307870	25307871	3.97109606646192	Akap7
chr10	25207846	25208444	chr10	25307870	25307871	2.05451951913093	Akap7
chr10	25239370	25239652	chr10	25307870	25307871	2.11948653411225	Akap7
chr10	25250343	25250570	chr10	25307870	25307871	2.42031123977557	Akap7
chr10	25296607	25297508	chr10	25307870	25307871	1.48300463614726	Akap7
chr10	25488708	25488968	chr10	25307870	25307871	1.30453684168142	Akap7
chr17	32357026	32357411	chr17	32321153	32321154	1.65710737334547	Akap8
chr5	3915736	3915936	chr5	3928054	3928055	1.76359211747273	Akap9
chr7	109731101	109731321	chr7	109703690	109703691	1.58365261139566	Akip1
chr7	109842066	109842503	chr7	109703690	109703691	3.58674844648236	Akip1
chr4	123529314	123529693	chr4	123750345	123750346	1.73206375541332	Akirin1
chr4	34312196	34312396	chr4	34550937	34550938	1.58324150490924	Akirin2
chr4	34410627	34410998	chr4	34550937	34550938	1.45544304754433	Akirin2
chr4	63226565	63226965	chr4	63403354	63403355	1.37276007088214	Akna
chr4	63230075	63230543	chr4	63403354	63403355	4.90108717005572	Akna
chr4	63291149	63291647	chr4	63403354	63403355	2.45381002040573	Akna
chr4	63372143	63372343	chr4	63403354	63403355	1.54042821008008	Akna
chr4	63403247	63403721	chr4	63403354	63403355	4.80364675240283	Akna
chr4	63410290	63411108	chr4	63403354	63403355	1.35586243780572	Akna
chr4	63459245	63460036	chr4	63403354	63403355	1.45982398041579	Akna
chr4	63496108	63496431	chr4	63403354	63403355	1.94528461663289	Akna
chr4	116448934	116449216	chr4	116651680	116651681	2.81272154349019	Akr1a1
chr4	116685258	116686194	chr4	116651680	116651681	2.14150829857502	Akr1a1
chr4	116862141	116862572	chr4	116651680	116651681	2.67776778703636	Akr1a1
chr6	34153475	34153827	chr6	34384218	34384219	1.66222747404488	Akr1b10
chr6	34371925	34372245	chr6	34384218	34384219	1.46713316570074	Akr1b10
chr6	34384297	34384548	chr6	34384218	34384219	5.5071522674944	Akr1b10
chr6	34148516	34149024	chr6	34317497	34317498	2.78219491061411	Akr1b3
chr6	34248969	34249494	chr6	34317497	34317498	3.91064945156234	Akr1b3
chr6	34317133	34317909	chr6	34317497	34317498	1.69443056034731	Akr1b3
chr6	34459831	34460298	chr6	34317497	34317498	2.82394357722513	Akr1b3
chr6	34511295	34511935	chr6	34317497	34317498	2.31259604181514	Akr1b3
chr6	34153475	34153827	chr6	34354119	34354120	1.88462369281776	Akr1b8
chr6	34154340	34154689	chr6	34354119	34354120	1.980019423331	Akr1b8
chr6	34248969	34249494	chr6	34354119	34354120	2.19901268293203	Akr1b8
chr6	34269504	34269861	chr6	34354119	34354120	3.64637194961478	Akr1b8
chr6	34459831	34460298	chr6	34354119	34354120	1.41300690150297	Akr1b8
chr13	4191157	4191501	chr13	4191184	4191185	3.08243398592033	Akr1c13
chr13	3992210	3992540	chr13	4228700	4228701	1.55613679261457	Akr1c19
chr13	4616270	4616682	chr13	4609174	4609175	1.76364836123116	Akr1e1
chr13	4771472	4771952	chr13	4609174	4609175	3.41600919768733	Akr1e1
chr4	139092171	139093214	chr4	139310744	139310745	1.33283049461281	Akr7a5
chr4	139192470	139193250	chr4	139310744	139310745	2.5039866425171	Akr7a5
chr4	139490752	139490952	chr4	139310744	139310745	2.49356764499931	Akr7a5
chr4	139526719	139526993	chr4	139310744	139310745	1.60288004820661	Akr7a5
chr12	112746840	112747170	chr12	112674884	112674885	1.33708490892657	Akt1
chr7	44685735	44686516	chr7	44848991	44848992	7.23716851318248	Akt1s1
chr7	44901420	44901679	chr7	44848991	44848992	1.72749274549393	Akt1s1
chr7	27577159	27577365	chr7	27591552	27591553	2.35858592088032	Akt2
chr7	27613776	27614656	chr7	27591552	27591553	7.61483748262211	Akt2
chr8	91171074	91171585	chr8	91134465	91134466	2.40059905944842	Aktip
chr8	91234294	91234926	chr8	91134465	91134466	4.67551109613717	Aktip
chr8	91278072	91278272	chr8	91134465	91134466	1.53001783051882	Aktip
chr8	91347429	91348090	chr8	91134465	91134466	3.03094780904452	Aktip
chr9	106080823	106081108	chr9	106248126	106248127	1.67416213234674	Alas1
chr9	106318134	106318729	chr9	106248126	106248127	3.62007312291283	Alas1
chr9	106338823	106339365	chr9	106248126	106248127	1.52046363683548	Alas1
chr9	106418294	106418788	chr9	106248126	106248127	2.81623563223477	Alas1
chrX	150709667	150709950	chrX	150547375	150547376	1.68200101507197	Alas2
chr16	52452997	52453739	chr16	52454074	52454075	2.90415727352548	Alcam
chr7	44974533	44975157	chr7	45154584	45154585	1.48856482011855	Aldh16a1
chr7	45015937	45016732	chr7	45154584	45154585	2.12368093444624	Aldh16a1
chr7	45017842	45018161	chr7	45154584	45154585	4.72240805764165	Aldh16a1
chr7	45198475	45198971	chr7	45154584	45154585	1.79893192410069	Aldh16a1
chr7	45216695	45216995	chr7	45154584	45154585	2.87301178078413	Aldh16a1
[truncated: 39,191 more rows]
